# Supplementary material for: Crystal landscape in the orcinol:4,4′-bipyridine system: synthon modularity, polymorphism and transferability of multipole charge density parameters
Source: PubMed Central journal article supplement (PMC4104971; doi:10.1107/s2052252513024421), 2013-10-01
Supplement: m-01-00008-sup10.pdf [file m-01-00008-sup10.pdf]

# Supplementary Information

## Crystal Landscape in the Orcinol:4,4'-Bipyridine System: Synthons Modularity, Polymorphism and Transferability of Multipole Charge Density Parameters

Ritesh Dubey, Mysore S. Pavan, Tayur N. Guru Row\*, Gautam R. Desiraju\*  
Solid State and Structural Chemistry Unit, Indian Institute of Science,  
Bangalore 560 012, India  
ssctng@sscu.iisc.ernet.in; desiraju@sscu.iisc.ernet.in

---

### TABLES

- Table 1:** Crystallographic Table for variable temperature data sets of Form **III**  
**Table 2:** Comparison of the topological parameters in SBFA and Theory of Form **III**  
**Table 3:** Intermolecular interaction table of the topological parameters of Form **IV**  
**Table 4:** Intermolecular interaction table of the topological parameters of Form **V**  
**Table 5:** High resolution experimental data of 4-hydroxybenzoic acid:Isonicotinamide  
**Table 6:** Intermolecular interaction table of the topological parameters of 4-hydroxybenzoic acid:Isonicotinamide  
**Table 7:** Topological parameters of the intramolecular bonding region in 4-hydroxybenzoic acid:Isonicotinamide  
**Table 8:** Comparisons of the *bcp* properties for intramolecular bonding region for Form **II**  
**Table 9:** Comparisons of the *bcp* properties for intramolecular bonding region for Form **III**  
**Table 10:** Topological parameters of the intramolecular bonding region in Form **IV** obtained from SBFA  
**Table 11:** Topological parameters of the intramolecular bonding region in Form **V** obtained from SBFA

### SCHEME

**Scheme 1:** Supramolecular synthons and the corresponding in-house SBFA library entry

### FIGURES

- Figure 1:** ORTEP diagrams for the asymmetric unit of the crystal structures (ellipsoids are drawn at 50% probability)  
**Figure 2:** Packing diagrams for Forms **I** through **V**  
**Figure 3:** Variation of  $U_{ij}$  with temperature in Form **III**  
**Figure 4:** Scatter plot depicting the variation of  $F_{obs}$  with  $F_{cal}$  for **4HYINA** (left) Variation of  $F_{obs}/F_{cal}$  with  $(\sin\theta)/\lambda$  (right)  
**Figure 5:** Experimental residual density, deformation density and Laplacian maps of 4-hydroxybenzoic acid:Isonicotinamide  
**Figure 6:** Deformation density and Laplacian maps of intermolecular O–H...N synthon in 4-hydroxybenzoic acid:Isonicotinamide  
**Figure 7:** Deformation and Laplacian diagrams of Form **II** (SBFA and Theory)  
**Figure 8:** Deformation and Laplacian diagrams of Form **III** (SBFA and Theory)  
**Figure 9:** Deformation and Laplacian diagrams of Form **IV** from SBFA  
**Figure 10:** Deformation density and Laplacian maps of Form **V** from SBFA.

**Table 1:** Crystallographic Table for Variable Temperature Data Sets of Form III

| <b>Orcinol:4,4'-Bipyridine (Form III)</b> |                                                                                                |                                                                                                |                                                                                                |                                                                                                |                                                                                                |
|-------------------------------------------|------------------------------------------------------------------------------------------------|------------------------------------------------------------------------------------------------|------------------------------------------------------------------------------------------------|------------------------------------------------------------------------------------------------|------------------------------------------------------------------------------------------------|
| CCDC No.                                  | 944964                                                                                         | 944965                                                                                         | 944963                                                                                         | 944966                                                                                         | 944967                                                                                         |
| Crystal colour                            | Colourless                                                                                     | Colourless                                                                                     | Colourless                                                                                     | Colourless                                                                                     | Colourless                                                                                     |
| Molecular formula                         | C <sub>14</sub> H <sub>16</sub> O <sub>4</sub> .C <sub>30</sub> H <sub>24</sub> N <sub>6</sub> | C <sub>14</sub> H <sub>16</sub> O <sub>4</sub> .C <sub>30</sub> H <sub>24</sub> N <sub>6</sub> | C <sub>14</sub> H <sub>16</sub> O <sub>4</sub> .C <sub>30</sub> H <sub>24</sub> N <sub>6</sub> | C <sub>14</sub> H <sub>16</sub> O <sub>4</sub> .C <sub>30</sub> H <sub>24</sub> N <sub>6</sub> | C <sub>14</sub> H <sub>16</sub> O <sub>4</sub> .C <sub>30</sub> H <sub>24</sub> N <sub>6</sub> |
| Formula weight                            | 716.83                                                                                         | 716.83                                                                                         | 716.83                                                                                         | 716.83                                                                                         | 716.83                                                                                         |
| Crystal system                            | Monoclinic                                                                                     | Monoclinic                                                                                     | Monoclinic                                                                                     | Monoclinic                                                                                     | Monoclinic                                                                                     |
| Space group                               | <i>P</i> 2 <sub>1</sub> / <i>n</i>                                                             | <i>P</i> 2 <sub>1</sub> / <i>n</i>                                                             | <i>P</i> 2 <sub>1</sub> / <i>n</i>                                                             | <i>P</i> 2 <sub>1</sub> / <i>n</i>                                                             | <i>P</i> 2 <sub>1</sub> / <i>n</i>                                                             |
| a (Å)                                     | 9.1938(4)                                                                                      | 9.1180(3)                                                                                      | 9.0828(3)                                                                                      | 9.2233(3)                                                                                      | 9.2233(3)                                                                                      |
| b (Å)                                     | 12.3828(6)                                                                                     | 12.3427(4)                                                                                     | 12.3446(4)                                                                                     | 36.2938(12)                                                                                    | 36.2938(12)                                                                                    |
| c (Å)                                     | 16.7311(8)                                                                                     | 16.6400(4)                                                                                     | 16.6095(4)                                                                                     | 16.5853(5)                                                                                     | 16.5853(5)                                                                                     |
| α (°)                                     | 90                                                                                             | 90                                                                                             | 90                                                                                             | 90                                                                                             | 90                                                                                             |
| β (°)                                     | 96.358(4)                                                                                      | 96.381(3)                                                                                      | 96.320(2)                                                                                      | 97.827(3)                                                                                      | 97.827(3)                                                                                      |
| γ (°)                                     | 90                                                                                             | 90                                                                                             | 90                                                                                             | 90                                                                                             | 90                                                                                             |
| V (Å <sup>3</sup> )                       | 1893.04(15)                                                                                    | 1861.08(10)                                                                                    | 1851.0(1)                                                                                      | 5500.2(3)                                                                                      | 5500.2(3)                                                                                      |
| Z                                         | 4                                                                                              | 4                                                                                              | 4                                                                                              | 4                                                                                              | 4                                                                                              |
| ρ <sub>calc</sub> (g/cm <sup>3</sup> )    | 1.258                                                                                          | 1.279                                                                                          | 1.286                                                                                          | 1.298                                                                                          | 1.298                                                                                          |
| F(000)                                    | 756                                                                                            | 756                                                                                            | 756                                                                                            | 2268                                                                                           | 2268                                                                                           |
| μ. (mm <sup>-1</sup> )                    | 0.082                                                                                          | 0.084                                                                                          | 0.084                                                                                          | 0.085                                                                                          | 0.085                                                                                          |
| T (K)                                     | <b>296(2)</b>                                                                                  | <b>200(2)</b>                                                                                  | <b>160(2)</b>                                                                                  | <b>140(2)</b>                                                                                  | <b>120(2)</b>                                                                                  |
| λ (Å)                                     | 0.71073                                                                                        | 0.71073                                                                                        | 0.71073                                                                                        | 0.71073                                                                                        | 0.71073                                                                                        |
| Reflns. collected                         | 13235                                                                                          | 12473                                                                                          | 12420                                                                                          | 38087                                                                                          | 38087                                                                                          |
| Unique reflns.                            | 4129                                                                                           | 4065                                                                                           | 4066                                                                                           | 12593                                                                                          | 12593                                                                                          |
| Completeness (%)                          | 99.9                                                                                           | 100                                                                                            | 100                                                                                            | 99.6                                                                                           | 99.6                                                                                           |
| R <sub>int</sub>                          | 0.048                                                                                          | 0.028                                                                                          | 0.029                                                                                          | 0.051                                                                                          | 0.051                                                                                          |
| R <sub>1</sub> (F)                        | 0.0673                                                                                         | 0.0583                                                                                         | 0.052                                                                                          | 0.0672                                                                                         | 0.0672                                                                                         |
| wR <sub>2</sub> (F <sup>2</sup> )         | 0.2324                                                                                         | 0.1699                                                                                         | 0.149                                                                                          | 0.1643                                                                                         | 0.1642                                                                                         |
| Goodness-of-fit                           | 1.064                                                                                          | 1.083                                                                                          | 1.060                                                                                          | 1.034                                                                                          | 1.034                                                                                          |
| 2θ <sub>max</sub>                         | 54                                                                                             | 54                                                                                             | 54                                                                                             | 54                                                                                             | 54                                                                                             |

**Table 2:** Comparison of the intermolecular topological parameters, in SBFA and Theory of Form III

| Synthon      | $\rho(\text{e}\text{\AA}^{-3})$ | $\nabla^2\rho(\text{e}\text{\AA}^{-5})$ | $R_{ij}(\text{\AA})$ | $\epsilon$ | $G(\text{kJmol}^{-1}\text{bohr}^{-3})$ | $V(\text{kJmol}^{-1}\text{bohr}^{-3})$ | $ V /G$ |
|--------------|---------------------------------|-----------------------------------------|----------------------|------------|----------------------------------------|----------------------------------------|---------|
| O1-H1...N1   | 0.31                            | 2.4                                     | 1.7946               | 0.05       | 87.85                                  | -110.34                                | 1.26    |
| CRYSTAL09    | 0.34                            | 2.4                                     | 1.7520               | 0.02       | 95.22                                  | -125.08                                | 1.31    |
| O2-H2...N2   | 0.31                            | 2.3                                     | 1.7478               | 0.05       | 86.04                                  | -109.43                                | 1.27    |
| CRYSTAL09    | 0.34                            | 2.7                                     | 1.7575               | 0.01       | 93.30                                  | -113.06                                | 1.21    |
| C15-H15...O2 | 0.04                            | 0.6                                     | 2.6673               | 0.34       | 12.35                                  | -8.36                                  | 0.68    |
| CRYSTAL09    | 0.06                            | 0.8                                     | 2.5712               | 0.36       | 17.39                                  | -13.0                                  | 0.75    |
| C9-H9...O1   | 0.03                            | 0.6                                     | 2.6258               | 0.68       | 11.79                                  | -7.25                                  | 0.61    |
| CRYSTAL09    | 0.06                            | 0.8                                     | 2.5464               | 0.14       | 17.39                                  | -13.0                                  | 0.75    |

**Table 3:** Intermolecular interaction table of the topological parameters of Form IV

| Synthon       | $\rho(\text{e}\text{\AA}^{-3})$ | $\nabla^2\rho(\text{e}\text{\AA}^{-5})$ | $R_{ij}(\text{\AA})$ | $\epsilon$ | $G(\text{kJmol}^{-1}\text{bohr}^{-3})$ | $V(\text{kJmol}^{-1}\text{bohr}^{-3})$ | $ V /G$ |
|---------------|---------------------------------|-----------------------------------------|----------------------|------------|----------------------------------------|----------------------------------------|---------|
| O5-H5O...N1   | 0.31                            | 2.3                                     | 1.7608               | 0.04       | 85.03                                  | -107.51                                | 1.26    |
| O4-H4O...N2   | 0.3                             | 2.2                                     | 1.7702               | 0.05       | 82.41                                  | -104.09                                | 1.26    |
| O6-H6O...N3   | 0.33                            | 2.4                                     | 1.742                | 0.03       | 91.74                                  | -118.46                                | 1.29    |
| O3-H3O...N4   | 0.31                            | 2.4                                     | 1.7514               | 0.04       | 87.22                                  | -110.38                                | 1.27    |
| O1-H1O...N8   | 0.30                            | 2.2                                     | 1.7708               | 0.04       | 83.36                                  | -105.97                                | 1.27    |
| O2-H2O...N9   | 0.32                            | 2.4                                     | 1.7406               | 0.04       | 90.58                                  | -116.05                                | 1.28    |
| C60-H60...O6  | 0.04                            | 0.7                                     | 2.6558               | 0.11       | 14.03                                  | -9.48                                  | 0.68    |
| C50-H50A...O2 | 0.03                            | 0.6                                     | 2.6383               | 0.14       | 11.23                                  | -7.28                                  | 0.65    |
| C52-H52...O2  | 0.04                            | 0.8                                     | 2.5687               | 0.47       | 14.97                                  | -9.23                                  | 0.62    |
| C11-H11C...O3 | 0.04                            | 0.6                                     | 2.6425               | 0.04       | 11.77                                  | -7.64                                  | 0.65    |
| C15-H15...O3  | 0.02                            | 0.5                                     | 2.7555               | 0.86       | 9.59                                   | -5.73                                  | 0.6     |
| C24-H24...O3  | 0.05                            | 0.8                                     | 2.6373               | 0.05       | 15.84                                  | -11.09                                 | 0.7     |
| C54-H54...O4  | 0.02                            | 0.6                                     | 2.6649               | 0.47       | 11.5                                   | -6.68                                  | 0.58    |
| C47-H47...O4  | 0.06                            | 1.0                                     | 2.4547               | 0.16       | 19.96                                  | -13.7                                  | 0.69    |
| C33-H33A...O5 | 0.03                            | 0.5                                     | 2.6857               | 0.11       | 9.98                                   | -6.34                                  | 0.64    |
| C34-H34...O5  | 0.03                            | 0.6                                     | 2.6901               | 0.79       | 11.21                                  | -6.81                                  | 0.61    |
| C2-H2...O5    | 0.05                            | 0.9                                     | 2.5278               | 0.24       | 18.13                                  | -12.67                                 | 0.7     |
| C17-H17...O6  | 0.02                            | 0.5                                     | 2.7215               | 0.87       | 9.86                                   | -5.46                                  | 0.55    |
| C13-H13...N8  | 0.05                            | 0.5                                     | 2.9731               | 1.02       | 12.01                                  | -9.18                                  | 0.76    |
| C13-H13...N9  | 0.04                            | 0.5                                     | 2.6921               | 0.23       | 10.03                                  | -6.76                                  | 0.67    |
| C38-H38...N2  | 0.03                            | 0.5                                     | 2.7982               | 0.78       | 9.39                                   | -6.2                                   | 0.66    |
| C47-H47...N2  | 0.03                            | 0.4                                     | 3.3672               | 0.16       | 8.05                                   | -5.23                                  | 0.65    |
| C56-H56...N3  | 0.04                            | 0.5                                     | 2.7735               | 1.84       | 10.68                                  | -7.18                                  | 0.67    |
| C11-H11B...N5 | 0.05                            | 0.7                                     | 2.7709               | 0.21       | 14.34                                  | -10.03                                 | 0.7     |

|            |      |     |        |      |       |        |      |
|------------|------|-----|--------|------|-------|--------|------|
| C44–H44…N6 | 0.05 | 0.8 | 2.5793 | 0.58 | 16.23 | –10.98 | 0.68 |
| C63–H63…N7 | 0.04 | 0.9 | 2.4907 | 0.24 | 17.32 | –10.67 | 0.62 |

**Table 4:** Intermolecular interaction table of the topological parameters of form **V**

| Synthon   | $\rho(\text{e}\text{\AA}^{-3})$ | $\nabla^2\rho(\text{e}\text{\AA}^{-5})$ | $R_{ij}(\text{\AA})$ | $\epsilon$ | $G(\text{kJmol}^{-1}\text{bohr}^{-3})$ | $V(\text{kJmol}^{-1}\text{bohr}^{-3})$ | $ V /G$ |
|-----------|---------------------------------|-----------------------------------------|----------------------|------------|----------------------------------------|----------------------------------------|---------|
| O5–H5O…N1 | 0.30                            | 2.2                                     | 1.788                | 0.04       | 82.53                                  | –104.50                                | 1.27    |
| O3–H3O…N2 | 0.32                            | 2.4                                     | 1.755                | 0.04       | 90.07                                  | –115.79                                | 1.29    |
| O6–H6O…N3 | 0.30                            | 2.2                                     | 1.795                | 0.04       | 80.24                                  | –101.26                                | 1.26    |
| O4–H4O…N4 | 0.28                            | 2.2                                     | 1.8105               | 0.02       | 77.55                                  | –96.17                                 | 1.24    |
| O2–H2O…N5 | 0.31                            | 2.3                                     | 1.764                | 0.04       | 86.35                                  | –110.30                                | 1.28    |
| O7–H7O…N7 | 0.30                            | 2.2                                     | 1.783                | 0.04       | 83.36                                  | –105.97                                | 1.27    |
| O8–H8O…N8 | 0.30                            | 2.2                                     | 1.7769               | 0.04       | 82.30                                  | –104.03                                | 1.26    |
| O1–H1O…N6 | 0.29                            | 2.2                                     | 1.7979               | 0.03       | 79.51                                  | –99.87                                 | 1.26    |
| C7–H7…O2  | 0.06                            | 0.8                                     | 2.5673               | 0.12       | 17.44                                  | –12.55                                 | 0.72    |

### Cohesive Energy calculations:

Energy computations were performed with the *CRYSTAL09* program package (Dovesi *et al.*, 2009) at the DFT (B3LYP) level of theory, employing the 6-31G\*\* basis set. Both Grimme dispersion correction and correction for basis set superposition error (BSSE) were applied. Ghost atoms were selected up to 4 Å distance from the considered molecule in a crystal lattice, and were used for the BSSE estimation.

The cohesive energy ( $E_{\text{coh}}$ ) was calculated using the formula:

$$E_{\text{coh}} = \frac{1}{Z} E_{\text{bulk}} - E_{\text{mol}}$$

where  $E_{\text{bulk}}$  is the total energy of a system (calculated per unit cell) and  $E_{\text{mol}}$  is the energy of a molecule extracted from the bulk.  $Z$  stands for the number of molecules in the unit cell. In the present case two approaches were tested. First, each molecule was considered separately. Then, the  $E_{\text{mol}}$  was calculated for all the molecules in the asymmetric unit and added. In the second approach, the energy of all the molecules in the asymmetric unit was calculated together. In both the cases the molecular fragment energy was calculated with BSSE correction. In all the calculations the X–H bonds were normalized to neutron values. In the end the second approach is the one reported because the asymmetric unit consists of a complex cluster of more than two (different) molecules and their combined energy offers a more meaningful description of  $E_{\text{mol}}$  in the present scenario.

In addition to the above method we also attempted to quantify the cohesive energies to a per-molecule description which is more appealing. In the per-molecule treatment the term  $E_{\text{mol}}$  was obtained by averaging the molecular energies of bipyridyl and orcinol's separately and later they

were averaged according to their ratios in the different forms. The value of Z in this method was taken as total number of molecules in the unit cell compared to the total number of molecular clusters in the previous method. These values were compared with the EML method also by a similar treatment where the per-molecule treatment was with respect to the asymmetric unit.

**Table 5:** High resolution experimental data of 4-hydroxybenzoic acid:Isonicotinamide (4HYINA)

|                                              |                                                               |                                                          |               |
|----------------------------------------------|---------------------------------------------------------------|----------------------------------------------------------|---------------|
| <i>CCDC No.</i>                              | 944959                                                        | $\lambda$ (Å)                                            | 0.71073       |
| <i>Molecular formula</i>                     | C <sub>13</sub> H <sub>12</sub> N <sub>2</sub> O <sub>4</sub> | <i>Reflns. collected</i>                                 | 169020        |
| <i>Formula weight</i>                        | 260.25                                                        | <i>Unique reflns.</i>                                    | 12238         |
| <i>Crystal system</i>                        | Monoclinic                                                    | <i>Completeness (%)</i>                                  | 100           |
| <i>Space group</i>                           | P2 <sub>1</sub> /n                                            | <i>Redundancy</i>                                        | 13.8          |
| <i>a</i> (Å)                                 | 6.0667(4)                                                     | <i>R<sub>int</sub></i>                                   | 0.037         |
| <i>b</i> (Å)                                 | 9.3620(6)                                                     | <i>Spherical atom refinement</i>                         |               |
| <i>c</i> (Å)                                 | 20.525(1)                                                     | <i>R<sub>1</sub> (F)</i>                                 | 0.0398        |
| $\alpha$ (°)                                 | 90                                                            | <i>wR<sub>2</sub> (F<sup>2</sup>)</i>                    | 0.1174        |
| $\beta$ (°)                                  | 95.033(3)                                                     | <i>Goodness-of-fit</i>                                   | 1.048         |
| $\gamma$ (°)                                 | 90                                                            | <i>Multipole refinement</i>                              |               |
| <i>V</i> (Å <sup>3</sup> )                   | 1161.3(1)                                                     | <i>Reflns. used [I &gt; 3σ(I)]</i>                       | 9494          |
| <i>Z</i>                                     | 4                                                             | <i>No of parameters</i>                                  | 359           |
| <i>ρ<sub>calc</sub></i> (gcm <sup>-3</sup> ) | 1.489                                                         | <i>R<sub>1</sub> (F<sup>2</sup>)</i>                     | 0.021         |
| <i>F</i> (000)                               | 544                                                           | <i>wR<sub>2</sub> (F<sup>2</sup>)</i>                    | 0.053         |
| $\mu$ (mm <sup>-1</sup> )                    | 0.112                                                         | <i>Goodness-of-fit</i>                                   | 1.211         |
| <i>T</i> (K)                                 | 100(2)                                                        | $\Delta\rho_{min}, \Delta\rho_{max}$ (eÅ <sup>-3</sup> ) | -0.194, 0.206 |

**Multipole Modeling:** The charge density modeling and multipolar aspherical atom refinements were performed based on the Hansen and Coppens multipole formalism using XD2006 (Hansen & Coppens, 1978; Volkov *et al.*, 2006). The function,  $\sum w (|F_o|^2 - K|F_c|^2)^2$  was minimized for all reflections with  $I > 3\sigma(I)$ . Weights (*w*) were taken as  $1/\sigma^2(F_o^2)$  and convergence criterion of the refinement was set to a maximal shift/esd  $< 10^{-10}$ . Su-Coppens-Macchi wave functions (Su & Coppens, 1998; Macchi & Coppens, 2001) were used for the core and valence scattering factors of all the atoms. The scale factor was refined against the whole resolution range of diffraction data in the first refinement step. The scatter plot of the variation of  $F_{obs}$  with  $F_{cal}$  is indicative of the quality of the data set after scaling. (Figure 2) The positional and anisotropic displacement parameters of the non-hydrogen atoms were refined using reflection data with  $\sin \theta/\lambda > 0.7 \text{ \AA}^{-1}$ . In the next step of refinement, the position and displacement parameters of the non-hydrogen atoms were fixed to the refined values. The C—H bond length was constrained to the values obtained from neutron diffraction experiments reported in literature. The isotropic displacement parameters of the H-atom was refined initially with reflection data  $\sin \theta/\lambda < 0.7 \text{ \AA}^{-1}$ . Further, the converged model was used to calculate anisotropic displacement parameters of H-atom using the

SHADE2 analysis (Madsen, 2006; Munshi *et al.*, 2008). ADP value of the H-atom obtained from SHADE2 analysis was kept fixed during the subsequent multipole refinements. Further scale, positional and anisotropic displacement parameters,  $P_{\text{val}}$ ,  $P_{\text{lm}}$ ,  $\kappa$  and  $\kappa'$  on non-hydrogen atoms were refined in a stepwise manner, until the convergence criterion was reached. Separate  $\kappa$  and  $\kappa'$  were used to define different non-H atom type based on their chemical environments. For the hydrogen atoms the value was fixed at 1.2. The multipole expansion was carried out upto the octupole level for non-hydrogen atoms ( $l = 3$ ). For the H atom, only monopole, bond directed dipole ( $d_z$ ) and quadrupole ( $q_{3z^2-1}$ ) components were refined during the multipole refinements. The quantitative analysis of the electron density topology and related properties was performed using the XDPROP module of XD software suite. Crystallographic refinement details of both spherical and multipolar model are summarized in Table 5.

**Table 6:** Intermolecular interaction table of the topological parameters of 4-hydroxybenzoic acid:Isonicotinamide

| Interaction  | $\rho_{\text{bcp}}$ | $\nabla^2\rho_{\text{bcp}}$ | $R_{ij}$ | $d_1$  | $d_2$  | $\lambda_1$ | $\lambda_2$ | $\lambda_3$ | $\varepsilon$ |
|--------------|---------------------|-----------------------------|----------|--------|--------|-------------|-------------|-------------|---------------|
| O3–H4...N1*  | 0.28                | 2.2                         | 1.7745   | 1.1932 | 0.5813 | –1.98       | –1.91       | 6.14        | 0.04          |
| O1–H1...O4   | 0.38                | 2.3                         | 1.5688   | 1.0859 | 0.4829 | –3.33       | –3.23       | 8.84        | 0.03          |
| N2–H2B...O2  | 0.13                | 1.9                         | 1.9790   | 1.2779 | 0.7011 | –0.76       | –0.74       | 3.37        | 0.02          |
| N2–H2A...O2  | 0.03                | 0.6                         | 2.5573   | 1.5089 | 1.0484 | –0.16       | –0.10       | 0.90        | 0.67          |
| C11–H11...O2 | 0.03                | 0.7                         | 2.5522   | 1.5312 | 1.0210 | –0.13       | –0.10       | 0.92        | 0.29          |
| N2–H2A...O1  | 0.05                | 0.8                         | 2.5318   | 1.4593 | 1.0724 | –0.21       | –0.17       | 1.20        | 0.21          |
| C8–H8...O1   | 0.06                | 1.0                         | 2.4745   | 1.4293 | 1.0452 | –0.22       | –0.20       | 1.40        | 0.06          |

\*This interaction was the most important for the present study

**Table 7:** Topological parameters of the intramolecular bonding region in 4-hydroxybenzoic acid:Isonicotinamide

| Bond   | $\rho$ | $\nabla^2\rho$ | $R_{ij}$ | $d_1$  | $d_2$  | $\lambda_1$ | $\lambda_2$ | $\lambda_3$ | $\varepsilon$ |
|--------|--------|----------------|----------|--------|--------|-------------|-------------|-------------|---------------|
| O1–C7  | 2.39   | –21.5          | 1.3241   | 0.7937 | 0.5303 | –21.3       | –18.8       | 18.6        | 0.13          |
| O1–H1  | 2.00   | –42.5          | 1.0180   | 0.8072 | 0.2108 | –35.3       | –35.0       | 27.8        | 0.01          |
| O2–C7  | 3.02   | –35.5          | 1.2277   | 0.7693 | 0.4584 | –30.3       | –25.4       | 20.2        | 0.19          |
| O3–C4  | 2.18   | –15.4          | 1.3501   | 0.7897 | 0.5604 | –18.9       | –16.8       | 20.3        | 0.12          |
| O3–H4  | 2.23   | –37.0          | 0.9921   | 0.7665 | 0.2255 | –36.1       | –35.2       | 34.3        | 0.03          |
| O4–C13 | 2.85   | –29.5          | 1.2437   | 0.7449 | 0.4988 | –26.5       | –23.0       | 19.9        | 0.15          |
| N1–C8  | 2.38   | –18.7          | 1.3385   | 0.7525 | 0.5860 | –19.5       | –17.3       | 18.1        | 0.13          |
| N1–C12 | 2.45   | –20.1          | 1.3402   | 0.7530 | 0.5872 | –21.2       | –17.4       | 18.5        | 0.22          |
| N2–C13 | 2.45   | –22.3          | 1.3311   | 0.7746 | 0.5565 | –22.1       | –17.5       | 17.3        | 0.26          |

|         |      |       |        |        |        |       |       |      |      |
|---------|------|-------|--------|--------|--------|-------|-------|------|------|
| N2-H2A  | 1.92 | -29.6 | 1.0101 | 0.7886 | 0.2214 | -28.4 | -27.3 | 26.1 | 0.04 |
| N2-H2B  | 2.20 | -34.8 | 1.0100 | 0.7659 | 0.2442 | -32.1 | -30.7 | 27.9 | 0.04 |
| C1-C2   | 2.18 | -17.3 | 1.4002 | 0.6860 | 0.7142 | -17.6 | -14.4 | 14.8 | 0.22 |
| C1-C6   | 2.12 | -16.1 | 1.3981 | 0.7026 | 0.6955 | -16.9 | -13.8 | 14.6 | 0.22 |
| C1-C7   | 1.84 | -12.2 | 1.4773 | 0.7105 | 0.7668 | -14.7 | -12.0 | 14.5 | 0.22 |
| C2-C3   | 2.18 | -17.9 | 1.3858 | 0.7047 | 0.6810 | -17.8 | -13.9 | 13.8 | 0.28 |
| C2-H2   | 1.75 | -14.5 | 1.0831 | 0.7431 | 0.3399 | -17.7 | -16.4 | 19.5 | 0.08 |
| C3-C4   | 2.17 | -18.0 | 1.4004 | 0.6930 | 0.7074 | -18.1 | -14.2 | 14.3 | 0.27 |
| C3-H3   | 1.92 | -19.8 | 1.0831 | 0.7031 | 0.3800 | -18.9 | -18.0 | 17.1 | 0.05 |
| C4-C5   | 2.21 | -18.2 | 1.4013 | 0.7174 | 0.6839 | -18.3 | -14.4 | 14.5 | 0.27 |
| C5-C6   | 2.15 | -17.1 | 1.3874 | 0.6883 | 0.6991 | -17.2 | -13.8 | 13.9 | 0.25 |
| C5-H5   | 1.79 | -14.5 | 1.0830 | 0.7388 | 0.3442 | -17.7 | -16.6 | 19.7 | 0.07 |
| C6-H6   | 1.86 | -17.0 | 1.0830 | 0.7167 | 0.3663 | -18.4 | -17.3 | 18.7 | 0.07 |
| C8-C9   | 2.23 | -19.3 | 1.3907 | 0.7094 | 0.6812 | -18.3 | -14.7 | 13.8 | 0.24 |
| C8-H8   | 1.92 | -19.0 | 1.0834 | 0.7158 | 0.3677 | -19.4 | -18.0 | 18.4 | 0.08 |
| C9-C10  | 2.17 | -17.4 | 1.3922 | 0.6931 | 0.6991 | -17.8 | -13.9 | 14.3 | 0.28 |
| C9-H9   | 1.75 | -16.7 | 1.0830 | 0.7394 | 0.3436 | -18.0 | -16.7 | 18.0 | 0.08 |
| C10-C11 | 2.13 | -17.1 | 1.3914 | 0.6894 | 0.7020 | -17.0 | -14.2 | 14.0 | 0.19 |
| C10-C13 | 1.79 | -11.6 | 1.4968 | 0.7445 | 0.7523 | -14.3 | -11.9 | 14.6 | 0.2  |
| C11-C12 | 2.23 | -18.6 | 1.3925 | 0.6687 | 0.7238 | -18.4 | -14.2 | 14.0 | 0.29 |
| C11-H11 | 1.75 | -16.8 | 1.0834 | 0.7499 | 0.3334 | -17.8 | -17.3 | 18.3 | 0.03 |
| C12-H12 | 1.68 | -16.1 | 1.0832 | 0.7463 | 0.3369 | -17.6 | -16.1 | 17.5 | 0.09 |

**Table 8:** Numerical (top) and graphical (bottom) comparison of the *bcp* properties for intramolecular bonding region obtained from SBFA modeled data with that obtained from theoretical calculations performed at B3LYP/6-31G(d,p) level of theory (CRYSTAL09) for Form II

| Bond      | $\rho$ | $\nabla^2\rho$ | $R_{ij}$ | $d_1$  | $d_2$  | $\lambda_1$ | $\lambda_2$ | $\lambda_3$ | $\epsilon$ |
|-----------|--------|----------------|----------|--------|--------|-------------|-------------|-------------|------------|
| O1-C3     | 2.10   | -13.0          | 1.3710   | 0.7916 | 0.5794 | -18.1       | -15.9       | 21.0        | 0.14       |
| CRYSTAL09 | 1.99   | -13.2          | 1.3713   | 0.7942 | 0.5771 | -16.2       | -14.8       | 17.8        | 0.10       |
| O1-H1     | 2.38   | -31.6          | 0.9921   | 0.7448 | 0.2472 | -35.7       | -34.6       | 38.8        | 0.03       |
| CRYSTAL09 | 2.25   | -33.3          | 0.9920   | 0.7523 | 0.2397 | -34.9       | -34.0       | 35.7        | 0.02       |
| O2-C5     | 2.12   | -13.1          | 1.3683   | 0.7894 | 0.5789 | -18.2       | -16.1       | 21.3        | 0.13       |
| CRYSTAL09 | 2.06   | -14.3          | 1.3683   | 0.7856 | 0.5826 | -16.7       | -15.9       | 18.3        | 0.05       |
| O2-H2     | 2.52   | -28.4          | 0.9921   | 0.7307 | 0.2614 | -36.0       | -34.8       | 42.3        | 0.03       |

|           |      |       |        |        |        |       |       |      |      |
|-----------|------|-------|--------|--------|--------|-------|-------|------|------|
| CRYSTAL09 | 2.30 | -36.7 | 0.9920 | 0.7509 | 0.2411 | -36.3 | -35.4 | 35.1 | 0.02 |
| N3-C19    | 2.37 | -21.2 | 1.3396 | 0.7789 | 0.5607 | -18.5 | -16.5 | 13.8 | 0.13 |
| CRYSTAL09 | 2.32 | -18.8 | 1.3393 | 0.7430 | 0.5963 | -18.4 | -16.6 | 16.3 | 0.11 |
| N3-C20    | 2.33 | -19.9 | 1.3310 | 0.7751 | 0.5560 | -19.4 | -16.2 | 15.7 | 0.20 |
| CRYSTAL09 | 2.38 | -21.0 | 1.3309 | 0.7433 | 0.5877 | -19.3 | -17.5 | 15.8 | 0.11 |
| N1-C8     | 2.43 | -20.4 | 1.3406 | 0.7584 | 0.5823 | -21.1 | -17.3 | 18.0 | 0.22 |
| CRYSTAL09 | 2.35 | -20.7 | 1.3392 | 0.7473 | 0.5919 | -19.5 | -16.9 | 15.6 | 0.15 |
| N1-C12    | 2.40 | -18.8 | 1.3435 | 0.7509 | 0.5926 | -20.8 | -16.8 | 18.7 | 0.24 |
| CRYSTAL09 | 2.37 | -20.3 | 1.3426 | 0.7383 | 0.6044 | -19.6 | -17.2 | 16.6 | 0.14 |
| N2-C15    | 2.43 | -20.3 | 1.3410 | 0.7566 | 0.5844 | -21.1 | -17.3 | 18.1 | 0.22 |
| CRYSTAL09 | 2.33 | -19.3 | 1.3397 | 0.7373 | 0.6024 | -19.2 | -16.6 | 16.5 | 0.15 |
| N2-C16    | 2.40 | -18.8 | 1.3420 | 0.7495 | 0.5926 | -20.7 | -16.8 | 18.7 | 0.24 |
| CRYSTAL09 | 2.33 | -19.6 | 1.3409 | 0.7430 | 0.5979 | -19.0 | -16.7 | 16.1 | 0.14 |
| C1-C2     | 2.11 | -18.1 | 1.3937 | 0.6751 | 0.7187 | -16.0 | -13.8 | 11.7 | 0.16 |
| CRYSTAL09 | 2.08 | -16.8 | 1.3933 | 0.7061 | 0.6872 | -16.5 | -12.7 | 12.4 | 0.30 |
| C1-C6     | 2.10 | -17.6 | 1.3922 | 0.6944 | 0.6978 | -16.6 | -13.0 | 12.0 | 0.28 |
| CRYSTAL09 | 2.14 | -17.9 | 1.3923 | 0.7018 | 0.6905 | -16.9 | -13.7 | 12.7 | 0.24 |
| C1-C7     | 1.80 | -11.0 | 1.5128 | 0.7721 | 0.7407 | -12.0 | -11.3 | 12.3 | 0.07 |
| CRYSTAL09 | 1.67 | -10.1 | 1.5111 | 0.7678 | 0.7433 | -11.4 | -11.1 | 12.4 | 0.03 |
| C2-C3     | 2.14 | -17.8 | 1.3920 | 0.6785 | 0.7135 | -18.0 | -13.7 | 13.9 | 0.31 |
| CRYSTAL09 | 2.14 | -18.8 | 1.3921 | 0.6737 | 0.7185 | -17.5 | -13.5 | 12.2 | 0.30 |
| C2-H2A    | 1.99 | -21.1 | 1.0830 | 0.7167 | 0.3663 | -20.1 | -18.9 | 17.9 | 0.06 |
| CRYSTAL09 | 1.94 | -21.7 | 1.0830 | 0.6899 | 0.3931 | -19.1 | -17.9 | 15.3 | 0.07 |
| C3-C4     | 2.19 | -19.3 | 1.3964 | 0.7297 | 0.6667 | -18.2 | -13.9 | 12.8 | 0.32 |
| CRYSTAL09 | 2.13 | -18.0 | 1.3963 | 0.7299 | 0.6664 | -17.2 | -13.5 | 12.6 | 0.28 |
| C4-C5     | 2.22 | -19.5 | 1.4007 | 0.6705 | 0.7302 | -18.3 | -14.3 | 13.0 | 0.28 |
| CRYSTAL09 | 2.11 | -17.2 | 1.4007 | 0.6893 | 0.7113 | -17.1 | -13.1 | 12.9 | 0.31 |
| C4-H4     | 1.96 | -21.8 | 1.0830 | 0.7275 | 0.3555 | -20.3 | -19.1 | 17.5 | 0.06 |
| CRYSTAL09 | 1.86 | -17.4 | 1.0830 | 0.7046 | 0.3784 | -18.0 | -16.9 | 17.5 | 0.06 |
| C5-C6     | 2.15 | -18.2 | 1.3932 | 0.7192 | 0.6739 | -17.9 | -14.1 | 13.8 | 0.28 |
| CRYSTAL09 | 2.14 | -18.6 | 1.3932 | 0.7146 | 0.6786 | -17.4 | -13.7 | 12.5 | 0.27 |
| C6-H6     | 2.02 | -20.7 | 1.0830 | 0.6984 | 0.3847 | -19.9 | -18.7 | 17.9 | 0.07 |
| CRYSTAL09 | 1.93 | -20.6 | 1.0830 | 0.6801 | 0.4029 | -18.9 | -17.0 | 15.3 | 0.11 |
| C7-H7A    | 1.85 | -18.0 | 1.0776 | 0.6591 | 0.4185 | -16.6 | -15.7 | 14.4 | 0.06 |
| CRYSTAL09 | 1.90 | -19.8 | 1.0770 | 0.6704 | 0.4066 | -17.3 | -16.8 | 14.3 | 0.02 |
| C7-H7B    | 1.78 | -14.4 | 1.0771 | 0.7042 | 0.3729 | -16.3 | -15.3 | 17.2 | 0.07 |
| CRYSTAL09 | 1.92 | -20.2 | 1.0771 | 0.6813 | 0.3957 | -17.8 | -17.6 | 15.2 | 0.01 |
| C7-H7C    | 1.78 | -13.4 | 1.0774 | 0.6908 | 0.3865 | -15.7 | -14.9 | 17.2 | 0.06 |
| CRYSTAL09 | 1.92 | -20.2 | 1.0771 | 0.6875 | 0.3896 | -18.2 | -17.8 | 15.7 | 0.02 |
| C8-C9     | 2.21 | -18.9 | 1.3878 | 0.7210 | 0.6668 | -18.4 | -14.1 | 13.7 | 0.30 |
| CRYSTAL09 | 2.21 | -20.6 | 1.3870 | 0.7122 | 0.6748 | -17.7 | -14.4 | 11.5 | 0.24 |
| C8-H8     | 1.81 | -15.7 | 1.0833 | 0.7078 | 0.3754 | -17.9 | -16.2 | 18.5 | 0.10 |



|           |      |       |        |        |        |       |       |      |      |
|-----------|------|-------|--------|--------|--------|-------|-------|------|------|
| CRYSTAL09 | 2.00 | -23.1 | 1.0831 | 0.7144 | 0.3687 | -20.7 | -19.3 | 16.9 | 0.07 |
| C9-C10    | 2.14 | -16.9 | 1.3979 | 0.6923 | 0.7057 | -17.1 | -14.1 | 14.3 | 0.21 |
| CRYSTAL09 | 2.14 | -18.7 | 1.3979 | 0.6910 | 0.7069 | -16.9 | -13.7 | 11.9 | 0.23 |
| C9-H9     | 1.85 | -16.3 | 1.0834 | 0.7213 | 0.3622 | -18.0 | -17.4 | 19.2 | 0.03 |
| CRYSTAL09 | 1.95 | -21.4 | 1.0832 | 0.6943 | 0.3889 | -19.1 | -18.0 | 15.6 | 0.06 |
| C10-C11   | 2.12 | -16.9 | 1.3923 | 0.6920 | 0.7003 | -16.8 | -14.2 | 14.0 | 0.18 |
| CRYSTAL09 | 2.20 | -20.4 | 1.3923 | 0.7058 | 0.6865 | -17.5 | -14.5 | 11.7 | 0.21 |
| C10-C13   | 1.78 | -10.9 | 1.4872 | 0.7458 | 0.7414 | -13.6 | -11.8 | 14.6 | 0.15 |
| CRYSTAL09 | 1.81 | -13.0 | 1.4872 | 0.7421 | 0.7451 | -13.2 | -11.8 | 12.1 | 0.12 |
| C11-C12   | 2.24 | -19.3 | 1.3821 | 0.6635 | 0.7186 | -18.6 | -14.3 | 13.7 | 0.30 |
| CRYSTAL09 | 2.26 | -21.8 | 1.3812 | 0.6699 | 0.7113 | -18.4 | -14.7 | 11.4 | 0.25 |
| C11-H11   | 1.85 | -16.3 | 1.0834 | 0.7230 | 0.3604 | -18.1 | -17.5 | 19.2 | 0.03 |
| CRYSTAL09 | 1.99 | -22.8 | 1.0830 | 0.7044 | 0.3786 | -20.1 | -18.8 | 16.1 | 0.07 |
| C12-H12   | 1.83 | -15.7 | 1.0833 | 0.7069 | 0.3764 | -18.0 | -16.4 | 18.7 | 0.10 |
| CRYSTAL09 | 2.01 | -23.6 | 1.0830 | 0.7044 | 0.3786 | -20.6 | -19.2 | 16.2 | 0.08 |
| C13-C14   | 2.12 | -17.2 | 1.3894 | 0.6893 | 0.7001 | -16.8 | -14.2 | 13.8 | 0.19 |
| CRYSTAL09 | 2.18 | -19.1 | 1.3894 | 0.7020 | 0.6874 | -17.1 | -13.9 | 11.9 | 0.22 |
| C13-C17   | 2.14 | -17.0 | 1.3969 | 0.6999 | 0.6970 | -17.1 | -14.2 | 14.3 | 0.21 |
| CRYSTAL09 | 2.17 | -19.0 | 1.3970 | 0.7040 | 0.6930 | -16.9 | -14.1 | 12.0 | 0.20 |
| C14-C15   | 2.23 | -19.1 | 1.3846 | 0.6640 | 0.7206 | -18.5 | -14.2 | 13.7 | 0.30 |
| CRYSTAL09 | 2.20 | -20.4 | 1.3838 | 0.6719 | 0.7119 | -17.5 | -14.3 | 11.4 | 0.22 |
| C14-H14   | 1.85 | -16.3 | 1.0834 | 0.7204 | 0.3631 | -18.0 | -17.4 | 19.2 | 0.03 |
| CRYSTAL09 | 1.92 | -19.9 | 1.0831 | 0.6968 | 0.3862 | -18.7 | -17.7 | 16.5 | 0.05 |
| C15-H15   | 1.81 | -15.7 | 1.0833 | 0.7095 | 0.3738 | -18.0 | -16.3 | 18.6 | 0.10 |
| CRYSTAL09 | 1.96 | -21.1 | 1.0830 | 0.7077 | 0.3753 | -19.8 | -18.4 | 17.1 | 0.08 |
| C16-C17   | 2.24 | -19.2 | 1.3843 | 0.7179 | 0.6664 | -18.6 | -14.3 | 13.7 | 0.30 |
| CRYSTAL09 | 2.21 | -20.5 | 1.3835 | 0.7127 | 0.6708 | -17.7 | -14.3 | 11.4 | 0.23 |
| C16-H16   | 1.81 | -15.7 | 1.0833 | 0.7108 | 0.3725 | -18.0 | -16.3 | 18.6 | 0.10 |
| CRYSTAL09 | 1.99 | -23.7 | 1.0831 | 0.6887 | 0.3944 | -20.1 | -18.6 | 15.0 | 0.08 |
| C17-H17   | 1.83 | -16.4 | 1.0834 | 0.7293 | 0.3541 | -18.0 | -17.5 | 19.1 | 0.03 |
| CRYSTAL09 | 1.96 | -22.0 | 1.0831 | 0.6968 | 0.3863 | -19.4 | -18.4 | 15.8 | 0.05 |
| C18-C19   | 2.36 | -22.2 | 1.3858 | 0.6951 | 0.6907 | -17.5 | -15.4 | 10.7 | 0.14 |
| CRYSTAL09 | 2.20 | -20.1 | 1.3842 | 0.6792 | 0.7050 | -17.6 | -14.1 | 11.6 | 0.25 |
| C18-C22   | 2.07 | -16.8 | 1.3915 | 0.6765 | 0.7150 | -16.1 | -13.3 | 12.5 | 0.21 |
| CRYSTAL09 | 2.18 | -19.7 | 1.3911 | 0.6945 | 0.6966 | -17.4 | -14.1 | 11.8 | 0.24 |
| C18-H18   | 1.91 | -20.1 | 1.0832 | 0.7288 | 0.3544 | -18.9 | -18.2 | 17.0 | 0.04 |
| CRYSTAL09 | 1.92 | -20.3 | 1.0832 | 0.6991 | 0.3841 | -18.8 | -17.7 | 16.2 | 0.06 |
| C19-H19   | 1.92 | -19.9 | 1.0830 | 0.6567 | 0.4263 | -17.4 | -16.6 | 14.1 | 0.05 |
| CRYSTAL09 | 1.93 | -19.6 | 1.0830 | 0.7086 | 0.3744 | -19.2 | -17.9 | 17.5 | 0.07 |
| C20-C21   | 2.20 | -18.9 | 1.3830 | 0.6776 | 0.7054 | -16.9 | -14.1 | 12.0 | 0.20 |
| CRYSTAL09 | 2.20 | -19.7 | 1.3827 | 0.7118 | 0.6709 | -17.1 | -14.1 | 11.5 | 0.22 |
| C20-H20   | 1.78 | -14.2 | 1.0831 | 0.7184 | 0.3647 | -17.2 | -16.1 | 19.1 | 0.07 |

|           |      |       |        |        |        |       |       |      |      |
|-----------|------|-------|--------|--------|--------|-------|-------|------|------|
| CRYSTAL09 | 1.99 | -23.4 | 1.0830 | 0.6987 | 0.3843 | -20.2 | -18.9 | 15.7 | 0.07 |
| C21-C22   | 2.09 | -16.7 | 1.3972 | 0.6718 | 0.7254 | -16.3 | -13.2 | 12.8 | 0.23 |
| CRYSTAL09 | 2.17 | -19.0 | 1.3970 | 0.6838 | 0.7132 | -17.0 | -14.0 | 12.0 | 0.21 |
| C21-H21   | 1.88 | -20.4 | 1.0833 | 0.7378 | 0.3455 | -18.9 | -18.3 | 16.8 | 0.04 |
| CRYSTAL09 | 1.93 | -19.4 | 1.0830 | 0.7007 | 0.3823 | -18.7 | -17.8 | 17.1 | 0.05 |

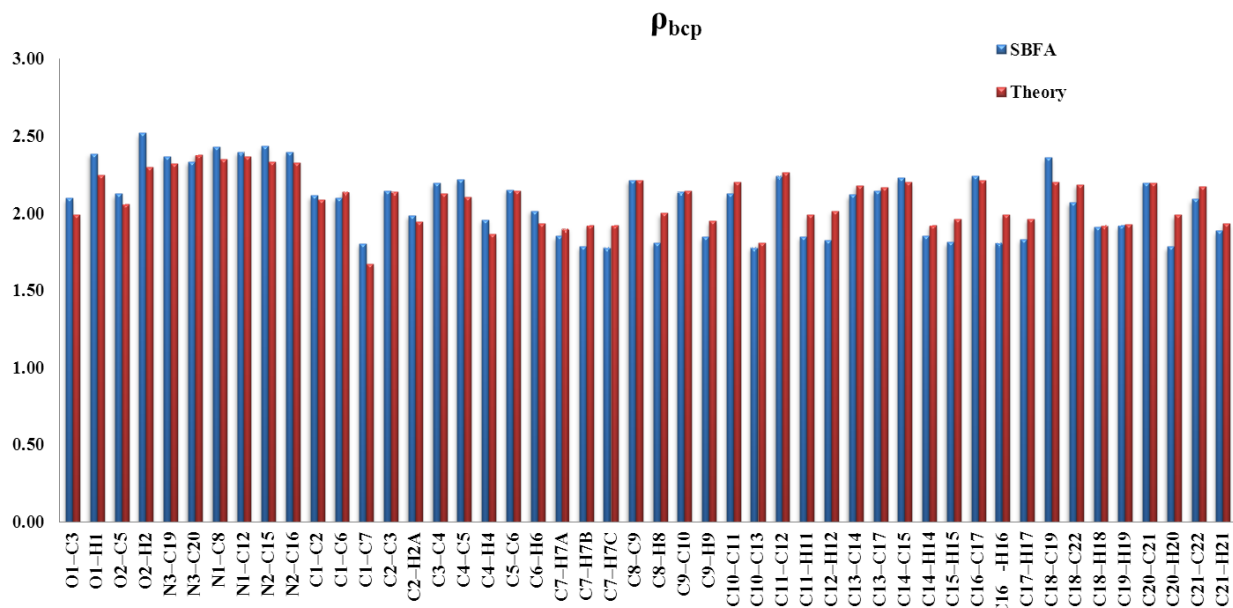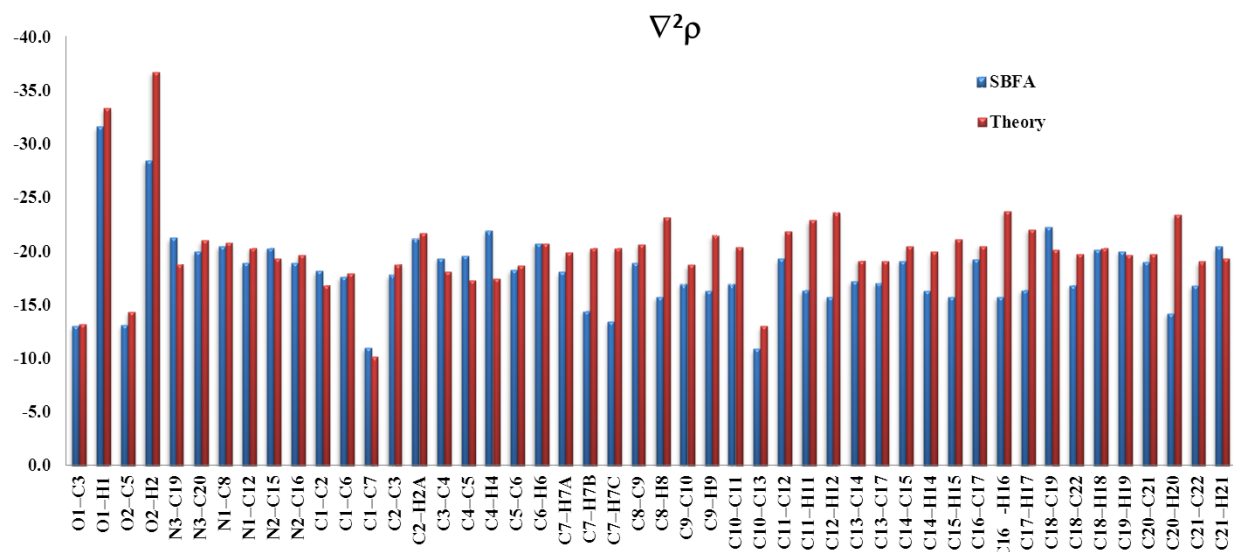

**Table 9:** Numerical (top) and graphical (bottom) comparison of the *bcp* properties for intramolecular bonding region obtained from SBFA modeled data with that obtained from theoretical calculations performed at B3LYP/6-31G(d,p) level of theory (CRYSTAL09) for Form III

| Bond      | $\rho$ | $\nabla^2\rho$ | $R_{ij}$ | $d_1$  | $d_2$  | $\lambda_1$ | $\lambda_2$ | $\lambda_3$ | $\epsilon$ |
|-----------|--------|----------------|----------|--------|--------|-------------|-------------|-------------|------------|
| O1-C3     | 2.13   | -13.3          | 1.3670   | 0.7902 | 0.5768 | -18.4       | -16.2       | 21.2        | 0.13       |
| CRYSTAL09 | 2.06   | -14.2          | 1.3675   | 0.7847 | 0.5828 | -16.4       | -15.0       | 17.1        | 0.10       |
| O1-H1     | 2.35   | -32.7          | 0.9921   | 0.7495 | 0.2425 | -35.9       | -34.8       | 37.9        | 0.03       |
| CRYSTAL09 | 2.21   | -31.1          | 0.9920   | 0.7514 | 0.2406 | -33.6       | -32.9       | 35.3        | 0.02       |
| O2-C5     | 2.16   | -13.2          | 1.3655   | 0.7871 | 0.5783 | -18.5       | -16.3       | 21.6        | 0.13       |
| CRYSTAL09 | 2.05   | -16.0          | 1.3656   | 0.7986 | 0.5671 | -16.4       | -15.1       | 15.6        | 0.09       |
| O2-H2     | 2.35   | -32.8          | 0.9921   | 0.7501 | 0.2420 | -35.9       | -34.8       | 37.8        | 0.03       |
| CRYSTAL09 | 2.28   | -34.8          | 0.9921   | 0.7500 | 0.2421 | -35.1       | -34.4       | 34.7        | 0.02       |
| N1-C15    | 2.38   | -19.5          | 1.3269   | 0.7658 | 0.5611 | -19.5       | -16.5       | 16.6        | 0.18       |
| CRYSTAL09 | 2.42   | -23.3          | 1.3268   | 0.7544 | 0.5724 | -19.4       | -18.1       | 14.3        | 0.07       |
| N1-C16    | 2.41   | -19.4          | 1.3375   | 0.7490 | 0.5885 | -20.9       | -16.9       | 18.5        | 0.24       |
| CRYSTAL09 | 2.36   | -21.3          | 1.3365   | 0.7630 | 0.5735 | -19.1       | -17.1       | 14.8        | 0.12       |
| N2-C8     | 2.42   | -19.5          | 1.3346   | 0.7619 | 0.5727 | -19.4       | -16.4       | 16.3        | 0.18       |
| CRYSTAL09 | 2.30   | -21.4          | 1.3338   | 0.7796 | 0.5542 | -18.7       | -16.2       | 13.5        | 0.15       |
| N2-C12    | 2.41   | -19.8          | 1.3348   | 0.7494 | 0.5853 | -21.0       | -16.9       | 18.1        | 0.24       |
| CRYSTAL09 | 2.44   | -24.0          | 1.3339   | 0.7602 | 0.5736 | -20.7       | -17.8       | 14.4        | 0.17       |
| N3-C19    | 2.48   | -22.2          | 1.3212   | 0.7502 | 0.5709 | -21.9       | -17.3       | 17.1        | 0.26       |
| CRYSTAL09 | 2.42   | -23.1          | 1.3209   | 0.7550 | 0.5659 | -20.0       | -17.2       | 14.2        | 0.16       |
| N3-C20    | 2.46   | -20.4          | 1.3204   | 0.7584 | 0.5620 | -20.2       | -17.0       | 16.8        | 0.18       |
| CRYSTAL09 | 2.46   | -23.3          | 1.3208   | 0.7535 | 0.5673 | -19.7       | -18.1       | 14.5        | 0.09       |
| C1-C2     | 2.14   | -18.1          | 1.3862   | 0.6771 | 0.7090 | -16.3       | -13.7       | 11.9        | 0.19       |
| CRYSTAL09 | 2.15   | -18.6          | 1.3857   | 0.7238 | 0.6619 | -16.2       | -13.2       | 10.9        | 0.23       |
| C1-C6     | 2.18   | -18.6          | 1.3795   | 0.6865 | 0.6929 | -17.2       | -13.5       | 12.1        | 0.27       |
| CRYSTAL09 | 2.18   | -19.3          | 1.3796   | 0.6877 | 0.6919 | -16.7       | -13.4       | 10.7        | 0.25       |
| C1-C7     | 1.84   | -10.4          | 1.5104   | 0.7653 | 0.7451 | -12.2       | -11.2       | 13.0        | 0.09       |
| CRYSTAL09 | 1.69   | -10.7          | 1.5072   | 0.7657 | 0.7415 | -11.6       | -11.0       | 11.8        | 0.05       |
| C2-C3     | 2.23   | -18.9          | 1.3921   | 0.6731 | 0.7190 | -18.5       | -14.6       | 14.2        | 0.27       |
| CRYSTAL09 | 2.16   | -19.3          | 1.3919   | 0.6671 | 0.7248 | -16.9       | -13.4       | 11.0        | 0.26       |
| C2-H2A    | 1.83   | -14.3          | 1.0830   | 0.7234 | 0.3596 | -17.7       | -16.6       | 20.0        | 0.07       |
| CRYSTAL09 | 1.92   | -20.1          | 1.0831   | 0.6944 | 0.3887 | -18.4       | -17.4       | 15.7        | 0.06       |
| C3-C4     | 2.23   | -18.7          | 1.3882   | 0.7052 | 0.6830 | -18.4       | -14.0       | 13.7        | 0.31       |
| CRYSTAL09 | 2.17   | -19.4          | 1.3881   | 0.7146 | 0.6735 | -17.3       | -13.4       | 11.3        | 0.29       |
| C4-C5     | 2.20   | -19.1          | 1.3899   | 0.6671 | 0.7228 | -17.8       | -14.4       | 13.0        | 0.24       |
| CRYSTAL09 | 2.18   | -19.4          | 1.3888   | 0.6662 | 0.7226 | -17.4       | -13.3       | 11.3        | 0.31       |
| C4-H4     | 2.00   | -20.7          | 1.0830   | 0.6993 | 0.3838 | -19.5       | -18.7       | 17.5        | 0.05       |
| CRYSTAL09 | 1.81   | -15.2          | 1.0830   | 0.7177 | 0.3653 | -17.1       | -16.1       | 18.1        | 0.06       |

|           |      |       |        |        |        |       |       |      |      |
|-----------|------|-------|--------|--------|--------|-------|-------|------|------|
| C5-C6     | 2.22 | -18.7 | 1.3949 | 0.7264 | 0.6686 | -18.4 | -14.5 | 14.2 | 0.27 |
| CRYSTAL09 | 2.12 | -18.8 | 1.3937 | 0.7264 | 0.6673 | -16.6 | -12.9 | 10.7 | 0.28 |
| C6-H6     | 1.86 | -14.3 | 1.0830 | 0.7114 | 0.3717 | -17.8 | -16.6 | 20.1 | 0.07 |
| CRYSTAL09 | 1.91 | -20.3 | 1.0832 | 0.6963 | 0.3869 | -18.5 | -17.1 | 15.4 | 0.08 |
| C7-H7A    | 1.84 | -21.5 | 1.0772 | 0.7316 | 0.3456 | -18.8 | -18.1 | 15.4 | 0.04 |
| CRYSTAL09 | 1.84 | -15.7 | 1.0770 | 0.6961 | 0.3810 | -17.1 | -16.2 | 17.5 | 0.06 |
| C7-H7B    | 1.57 | -12.1 | 1.0788 | 0.7257 | 0.3531 | -14.6 | -13.9 | 16.3 | 0.05 |
| CRYSTAL09 | 1.86 | -16.8 | 1.0769 | 0.6735 | 0.4034 | -16.8 | -15.9 | 15.9 | 0.06 |
| C7-H7C    | 1.75 | -15.3 | 1.0772 | 0.7343 | 0.3430 | -16.7 | -16.0 | 17.4 | 0.04 |
| CRYSTAL09 | 1.84 | -17.4 | 1.0772 | 0.6688 | 0.4084 | -16.9 | -15.6 | 15.1 | 0.08 |
| C8-C9     | 2.15 | -18.1 | 1.3776 | 0.6732 | 0.7044 | -16.8 | -13.8 | 12.5 | 0.22 |
| CRYSTAL09 | 2.23 | -19.8 | 1.3777 | 0.7076 | 0.6701 | -17.2 | -14.4 | 11.8 | 0.20 |
| C8-H8     | 1.85 | -21.3 | 1.0830 | 0.7329 | 0.3501 | -19.2 | -18.5 | 16.4 | 0.04 |
| CRYSTAL09 | 1.94 | -19.6 | 1.0827 | 0.7163 | 0.3665 | -19.3 | -18.3 | 18.0 | 0.06 |
| C9-C10    | 2.16 | -17.4 | 1.3834 | 0.6958 | 0.6875 | -17.3 | -14.1 | 14.1 | 0.23 |
| CRYSTAL09 | 2.16 | -18.5 | 1.3828 | 0.6574 | 0.7254 | -16.1 | -13.5 | 11.2 | 0.19 |
| C9-H9     | 1.74 | -14.8 | 1.0830 | 0.7519 | 0.3312 | -17.5 | -16.5 | 19.3 | 0.06 |
| CRYSTAL09 | 1.93 | -19.9 | 1.0832 | 0.6806 | 0.4026 | -17.9 | -17.3 | 15.3 | 0.04 |
| C11-C10   | 2.16 | -17.5 | 1.3888 | 0.6713 | 0.7175 | -16.8 | -13.8 | 13.2 | 0.21 |
| CRYSTAL09 | 2.16 | -18.7 | 1.3887 | 0.6988 | 0.6899 | -16.6 | -13.5 | 11.4 | 0.22 |
| C11-C12   | 2.36 | -22.5 | 1.3775 | 0.6717 | 0.7058 | -19.2 | -15.9 | 12.6 | 0.21 |
| CRYSTAL09 | 2.24 | -21.3 | 1.3759 | 0.6551 | 0.7208 | -17.9 | -14.3 | 10.9 | 0.25 |
| C11-H11   | 1.87 | -19.9 | 1.0832 | 0.7159 | 0.3673 | -18.7 | -17.7 | 16.5 | 0.05 |
| CRYSTAL09 | 1.98 | -22.4 | 1.0831 | 0.6958 | 0.3873 | -19.1 | -18.5 | 15.3 | 0.03 |
| C10-C13   | 1.80 | -11.0 | 1.4837 | 0.7445 | 0.7392 | -13.7 | -11.9 | 14.7 | 0.15 |
| CRYSTAL09 | 1.77 | -12.3 | 1.4836 | 0.7551 | 0.7285 | -12.5 | -11.4 | 11.6 | 0.10 |
| C12-H12   | 1.81 | -15.7 | 1.0833 | 0.7059 | 0.3774 | -17.9 | -16.2 | 18.5 | 0.11 |
| CRYSTAL09 | 1.98 | -22.0 | 1.0831 | 0.6940 | 0.3891 | -20.0 | -18.2 | 16.2 | 0.10 |
| C13-C14   | 2.16 | -17.4 | 1.3892 | 0.7102 | 0.6790 | -16.8 | -13.8 | 13.3 | 0.22 |
| CRYSTAL09 | 2.16 | -18.5 | 1.3890 | 0.7066 | 0.6825 | -16.4 | -13.6 | 11.5 | 0.21 |
| C13-C17   | 2.14 | -17.4 | 1.3847 | 0.6966 | 0.6881 | -16.5 | -13.9 | 13.1 | 0.18 |
| CRYSTAL09 | 2.16 | -18.3 | 1.3850 | 0.7248 | 0.6601 | -16.4 | -13.0 | 11.2 | 0.26 |
| C14-C15   | 2.24 | -19.5 | 1.3803 | 0.7040 | 0.6762 | -17.6 | -14.6 | 12.7 | 0.21 |
| CRYSTAL09 | 2.21 | -19.7 | 1.3797 | 0.6638 | 0.7159 | -17.1 | -14.4 | 11.7 | 0.19 |
| C14-H14   | 1.84 | -20.5 | 1.0832 | 0.7319 | 0.3513 | -18.8 | -17.9 | 16.3 | 0.05 |
| CRYSTAL09 | 1.94 | -19.9 | 1.0831 | 0.6957 | 0.3874 | -18.6 | -18.0 | 16.6 | 0.03 |
| C15-H15   | 1.80 | -14.3 | 1.0831 | 0.7234 | 0.3597 | -17.4 | -16.3 | 19.5 | 0.07 |
| CRYSTAL09 | 1.91 | -19.2 | 1.0829 | 0.6850 | 0.3979 | -18.4 | -16.9 | 16.1 | 0.09 |
| C16-C17   | 2.40 | -22.9 | 1.3758 | 0.7014 | 0.6743 | -19.5 | -16.2 | 12.8 | 0.21 |
| CRYSTAL09 | 2.21 | -19.8 | 1.3747 | 0.7174 | 0.6574 | -17.3 | -14.0 | 11.4 | 0.24 |
| C16-H16   | 1.75 | -15.7 | 1.0833 | 0.7238 | 0.3595 | -17.7 | -16.1 | 18.1 | 0.10 |
| CRYSTAL09 | 1.97 | -21.8 | 1.0831 | 0.6887 | 0.3944 | -19.6 | -18.1 | 15.8 | 0.09 |

|           |      |       |        |        |        |       |       |      |      |
|-----------|------|-------|--------|--------|--------|-------|-------|------|------|
| C17-H17   | 1.93 | -19.9 | 1.0832 | 0.7088 | 0.3744 | -19.0 | -18.0 | 17.1 | 0.05 |
| CRYSTAL09 | 1.93 | -20.6 | 1.0831 | 0.7158 | 0.3673 | -18.7 | -18.6 | 16.8 | 0.01 |
| C18-C19   | 2.38 | -22.5 | 1.3808 | 0.6762 | 0.7046 | -19.2 | -16.0 | 12.8 | 0.20 |
| CRYSTAL09 | 2.24 | -21.0 | 1.3789 | 0.6740 | 0.7049 | -17.6 | -14.4 | 11.0 | 0.22 |
| C18-C22   | 2.18 | -17.7 | 1.3839 | 0.6734 | 0.7105 | -17.0 | -14.0 | 13.2 | 0.22 |
| CRYSTAL09 | 2.22 | -20.9 | 1.3831 | 0.6851 | 0.6980 | -17.0 | -14.7 | 10.8 | 0.15 |
| C18-H18   | 1.82 | -20.7 | 1.0832 | 0.7373 | 0.3459 | -18.8 | -17.9 | 16.1 | 0.05 |
| CRYSTAL09 | 1.87 | -17.7 | 1.0834 | 0.6912 | 0.3922 | -17.6 | -16.3 | 16.2 | 0.08 |
| C19-H19   | 1.72 | -15.7 | 1.0833 | 0.7286 | 0.3547 | -17.5 | -16.0 | 17.8 | 0.10 |
| CRYSTAL09 | 1.90 | -18.9 | 1.0831 | 0.7389 | 0.3442 | -19.7 | -18.5 | 19.3 | 0.06 |
| C20-C21   | 2.20 | -18.1 | 1.3797 | 0.6970 | 0.6827 | -16.9 | -14.1 | 12.9 | 0.20 |
| CRYSTAL09 | 2.20 | -19.4 | 1.3795 | 0.6999 | 0.6796 | -17.2 | -13.8 | 11.6 | 0.25 |
| C20-H20   | 1.68 | -15.1 | 1.0831 | 0.7626 | 0.3205 | -17.3 | -16.3 | 18.5 | 0.06 |
| CRYSTAL09 | 1.97 | -22.1 | 1.0830 | 0.6819 | 0.4012 | -19.3 | -17.9 | 15.1 | 0.08 |
| C21-C22   | 2.27 | -19.6 | 1.3748 | 0.6996 | 0.6752 | -18.0 | -14.9 | 13.3 | 0.21 |
| CRYSTAL09 | 2.20 | -20.3 | 1.3754 | 0.7159 | 0.6595 | -17.2 | -14.0 | 10.9 | 0.23 |
| C21-H21   | 1.80 | -21.2 | 1.0832 | 0.7482 | 0.3349 | -19.1 | -18.2 | 16.0 | 0.05 |
| CRYSTAL09 | 1.90 | -18.3 | 1.0831 | 0.6904 | 0.3928 | -17.8 | -16.9 | 16.5 | 0.05 |

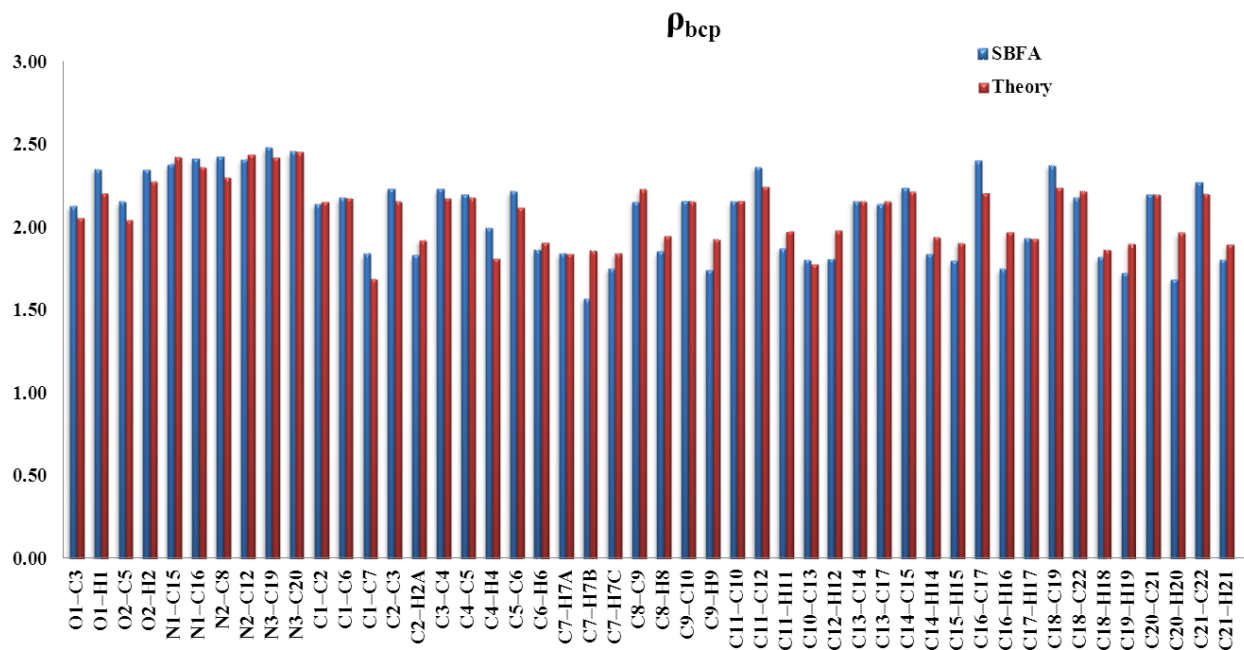

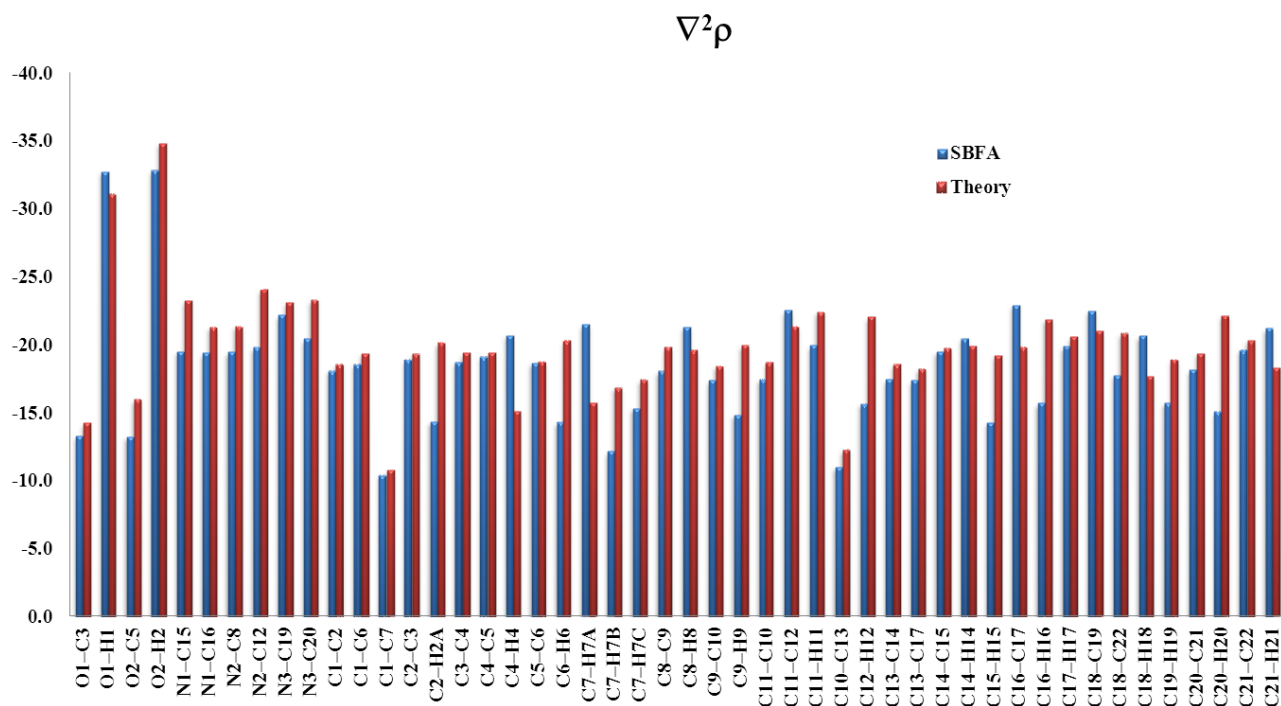

**Table 10:** Topological values at the *bcp* for intramolecular bonding region obtained from SBFA modeled data for Form IV

| Bond    | $\rho$ | $\nabla^2\rho$ | $R_{ij}$ | $d_1$  | $d_2$  | $\lambda_1$ | $\lambda_2$ | $\lambda_3$ | $\varepsilon$ |
|---------|--------|----------------|----------|--------|--------|-------------|-------------|-------------|---------------|
| C13-C14 | 2.18   | -18.9          | 1.3915   | 0.6733 | 0.7182 | -17.7       | -14.2       | 13.0        | 0.24          |
| C14-O1  | 2.12   | -13.3          | 1.3662   | 0.5767 | 0.7895 | -18.3       | -16.1       | 21.1        | 0.13          |
| C15-C14 | 2.21   | -18.7          | 1.3937   | 0.6725 | 0.7212 | -18.4       | -14.5       | 14.1        | 0.27          |
| H1O-O1  | 2.26   | -35.0          | 0.9921   | 0.2329 | 0.7592 | -35.7       | -34.7       | 35.4        | 0.03          |
| C12-O2  | 2.12   | -13.5          | 1.3641   | 0.5755 | 0.7886 | -18.4       | -16.1       | 21.0        | 0.14          |
| C13-C12 | 2.22   | -18.5          | 1.3898   | 0.6857 | 0.7040 | -18.3       | -13.9       | 13.7        | 0.32          |
| C17-C12 | 2.21   | -18.9          | 1.3921   | 0.6707 | 0.7214 | -18.4       | -14.5       | 14.0        | 0.27          |
| H2O-O2  | 2.34   | -32.3          | 0.9921   | 0.2437 | 0.7483 | -35.5       | -34.4       | 37.6        | 0.03          |
| C36-C37 | 2.17   | -18.3          | 1.3919   | 0.6792 | 0.7127 | -18.2       | -14.2       | 14.0        | 0.28          |
| C37-O3  | 2.12   | -13.1          | 1.3653   | 0.5790 | 0.7862 | -18.3       | -16.1       | 21.3        | 0.14          |
| C38-C37 | 2.21   | -19.4          | 1.3931   | 0.6606 | 0.7324 | -17.9       | -14.5       | 13.0        | 0.23          |
| H3O-O3  | 2.32   | -32.7          | 0.9921   | 0.2422 | 0.7499 | -35.4       | -34.4       | 37.1        | 0.03          |
| C34-C39 | 2.21   | -18.7          | 1.3940   | 0.6776 | 0.7164 | -18.3       | -14.5       | 14.1        | 0.27          |
| C38-C39 | 2.20   | -18.5          | 1.3902   | 0.6872 | 0.7030 | -18.2       | -13.8       | 13.5        | 0.32          |
| C39-O4  | 2.10   | -13.7          | 1.3654   | 0.5733 | 0.7921 | -18.2       | -16.1       | 20.6        | 0.13          |
| H4O-O4  | 2.33   | -32.9          | 0.9921   | 0.2413 | 0.7507 | -35.7       | -34.6       | 37.3        | 0.03          |

|         |      |       |        |        |        |       |       |      |      |
|---------|------|-------|--------|--------|--------|-------|-------|------|------|
| C56-C55 | 2.19 | -19.2 | 1.3957 | 0.6678 | 0.7279 | -17.8 | -14.4 | 13.0 | 0.23 |
| C54-C55 | 2.16 | -18.4 | 1.3902 | 0.6839 | 0.7063 | -18.2 | -14.1 | 13.9 | 0.28 |
| C55-O5  | 2.11 | -13.9 | 1.3643 | 0.5715 | 0.7928 | -18.3 | -16.1 | 20.5 | 0.13 |
| H5O-O5  | 2.32 | -33.3 | 0.9921 | 0.2398 | 0.7523 | -35.7 | -34.7 | 37.1 | 0.03 |
| C51-O6  | 2.11 | -13.5 | 1.3666 | 0.5757 | 0.7910 | -18.2 | -16.1 | 20.9 | 0.13 |
| C52-C51 | 2.21 | -18.8 | 1.3935 | 0.6755 | 0.7180 | -18.4 | -14.5 | 14.1 | 0.27 |
| C56-C51 | 2.21 | -18.5 | 1.3921 | 0.6872 | 0.7049 | -18.3 | -13.9 | 13.6 | 0.32 |
| H6O-O6  | 2.34 | -32.6 | 0.9921 | 0.2428 | 0.7492 | -35.7 | -34.6 | 37.7 | 0.03 |
| C9-N1   | 2.39 | -19.0 | 1.3416 | 0.5914 | 0.7502 | -20.8 | -16.8 | 18.5 | 0.24 |
| C10-N1  | 2.46 | -20.2 | 1.3397 | 0.5868 | 0.7529 | -21.2 | -17.4 | 18.5 | 0.22 |
| C1-N2   | 2.41 | -19.4 | 1.3374 | 0.5892 | 0.7482 | -21.0 | -16.9 | 18.5 | 0.24 |
| C3-N2   | 2.46 | -20.7 | 1.3359 | 0.5828 | 0.7531 | -21.4 | -17.5 | 18.2 | 0.22 |
| C25-N3  | 2.44 | -20.3 | 1.3390 | 0.5857 | 0.7533 | -21.2 | -17.4 | 18.3 | 0.22 |
| C27-N3  | 2.38 | -18.9 | 1.3428 | 0.5928 | 0.7499 | -20.7 | -16.7 | 18.5 | 0.24 |
| C18-N4  | 2.39 | -18.3 | 1.3441 | 0.5983 | 0.7457 | -20.7 | -16.7 | 19.0 | 0.23 |
| C22-N4  | 2.41 | -19.8 | 1.3435 | 0.5876 | 0.7558 | -20.9 | -17.1 | 18.2 | 0.22 |
| C28-N5  | 2.42 | -19.8 | 1.3354 | 0.5859 | 0.7495 | -21.0 | -17.0 | 18.3 | 0.24 |
| C32-N5  | 2.50 | -21.4 | 1.3307 | 0.5787 | 0.7520 | -21.6 | -17.8 | 18.1 | 0.22 |
| H33C-N6 | 0.04 | 0.5   | 2.8326 | 1.2245 | 1.6081 | -0.1  | -0.1  | 0.8  | 0.42 |
| C47-N6  | 2.44 | -20.1 | 1.3413 | 0.5865 | 0.7547 | -21.1 | -17.3 | 18.4 | 0.22 |
| C48-N6  | 2.42 | -19.1 | 1.3399 | 0.5920 | 0.7479 | -20.9 | -16.9 | 18.7 | 0.24 |
| C40-N7  | 2.46 | -20.3 | 1.3382 | 0.5857 | 0.7525 | -21.3 | -17.5 | 18.4 | 0.22 |
| C44-N7  | 2.41 | -19.3 | 1.3382 | 0.5900 | 0.7482 | -20.9 | -16.9 | 18.5 | 0.24 |
| C63-N8  | 2.38 | -18.4 | 1.3446 | 0.5967 | 0.7479 | -20.6 | -16.7 | 18.8 | 0.24 |
| C65-N8  | 2.45 | -19.9 | 1.3393 | 0.5890 | 0.7502 | -21.2 | -17.4 | 18.6 | 0.21 |
| C60-N9  | 2.44 | -20.5 | 1.3386 | 0.5832 | 0.7554 | -21.2 | -17.4 | 18.1 | 0.22 |
| C66-N9  | 2.38 | -18.7 | 1.3438 | 0.5935 | 0.7503 | -20.7 | -16.7 | 18.6 | 0.24 |
| C2-C1   | 2.22 | -19.2 | 1.3848 | 0.6595 | 0.7253 | -18.4 | -14.2 | 13.5 | 0.30 |
| C2-C5   | 2.17 | -17.8 | 1.3862 | 0.6833 | 0.7028 | -17.4 | -14.4 | 14.0 | 0.21 |
| H1-C1   | 1.80 | -15.7 | 1.0833 | 0.3706 | 0.7126 | -17.9 | -16.3 | 18.5 | 0.10 |
| H4-C4   | 1.81 | -16.4 | 1.0834 | 0.3518 | 0.7316 | -18.0 | -17.4 | 19.0 | 0.03 |
| C6-C5   | 1.78 | -10.8 | 1.4882 | 0.7422 | 0.7460 | -13.6 | -11.8 | 14.6 | 0.16 |
| H2-C2   | 1.87 | -16.2 | 1.0835 | 0.3729 | 0.7106 | -18.0 | -17.4 | 19.2 | 0.04 |
| H3-C3   | 1.82 | -15.7 | 1.0833 | 0.3724 | 0.7109 | -18.1 | -16.4 | 18.7 | 0.10 |
| C4-C3   | 2.26 | -19.6 | 1.3797 | 0.6608 | 0.7189 | -18.7 | -14.5 | 13.6 | 0.29 |
| C5-C4   | 2.15 | -17.6 | 1.3849 | 0.6877 | 0.6972 | -17.1 | -14.4 | 13.9 | 0.19 |
| C6-C7   | 2.12 | -17.2 | 1.3899 | 0.6909 | 0.6990 | -16.8 | -14.1 | 13.8 | 0.19 |
| C8-C6   | 2.14 | -17.0 | 1.3968 | 0.6963 | 0.7005 | -17.1 | -14.2 | 14.3 | 0.20 |
| H7-C7   | 1.84 | -16.3 | 1.0834 | 0.3623 | 0.7212 | -18.0 | -17.4 | 19.1 | 0.03 |
| H8-C8   | 1.86 | -16.3 | 1.0834 | 0.3637 | 0.7197 | -18.1 | -17.5 | 19.4 | 0.03 |
| C7-C9   | 2.24 | -19.4 | 1.3800 | 0.6603 | 0.7198 | -18.6 | -14.4 | 13.5 | 0.30 |
| H9-C9   | 1.80 | -15.7 | 1.0833 | 0.3710 | 0.7123 | -17.9 | -16.2 | 18.5 | 0.10 |

|          |      |       |        |        |        |       |       |      |      |
|----------|------|-------|--------|--------|--------|-------|-------|------|------|
| H10-C10  | 1.86 | -15.8 | 1.0833 | 0.3786 | 0.7047 | -18.3 | -16.6 | 19.1 | 0.10 |
| C8-C10   | 2.26 | -19.3 | 1.3808 | 0.6603 | 0.7206 | -18.6 | -14.4 | 13.8 | 0.29 |
| C16-C17  | 2.11 | -17.7 | 1.3911 | 0.6819 | 0.7092 | -16.0 | -13.5 | 11.9 | 0.19 |
| C16-C15  | 2.14 | -17.9 | 1.3904 | 0.6890 | 0.7015 | -16.8 | -13.2 | 12.2 | 0.27 |
| C11-C16  | 1.85 | -11.7 | 1.5043 | 0.7364 | 0.7679 | -12.7 | -11.4 | 12.3 | 0.11 |
| H11A-C11 | 1.80 | -14.6 | 1.0772 | 0.3742 | 0.7029 | -16.5 | -15.3 | 17.3 | 0.08 |
| H11B-C11 | 1.75 | -13.6 | 1.0773 | 0.3745 | 0.7029 | -15.7 | -14.9 | 17.1 | 0.06 |
| H11C-C11 | 1.74 | -12.8 | 1.0776 | 0.4182 | 0.6593 | -15.0 | -14.0 | 16.1 | 0.07 |
| H13-C13  | 1.98 | -20.7 | 1.0830 | 0.3797 | 0.7033 | -19.5 | -18.7 | 17.5 | 0.05 |
| H15-C15  | 1.88 | -14.3 | 1.0831 | 0.3750 | 0.7081 | -17.9 | -16.7 | 20.2 | 0.07 |
| H17-C17  | 1.86 | -14.3 | 1.0831 | 0.3722 | 0.7108 | -17.8 | -16.6 | 20.1 | 0.07 |
| C19-C18  | 2.27 | -19.5 | 1.3805 | 0.6632 | 0.7173 | -18.8 | -14.6 | 13.8 | 0.29 |
| C20-C19  | 2.13 | -17.2 | 1.3899 | 0.6854 | 0.7045 | -16.9 | -14.2 | 13.9 | 0.19 |
| H18-C18  | 1.86 | -15.8 | 1.0833 | 0.3802 | 0.7031 | -18.3 | -16.5 | 19.0 | 0.10 |
| H21-C21  | 1.82 | -16.3 | 1.0834 | 0.3577 | 0.7258 | -17.9 | -17.3 | 18.9 | 0.03 |
| C23-C20  | 1.76 | -10.8 | 1.4883 | 0.7426 | 0.7457 | -13.6 | -11.6 | 14.4 | 0.17 |
| H19-C19  | 1.86 | -16.3 | 1.0834 | 0.3596 | 0.7238 | -18.2 | -17.6 | 19.5 | 0.03 |
| H22-C22  | 1.82 | -15.7 | 1.0833 | 0.3773 | 0.7060 | -18.0 | -16.3 | 18.5 | 0.10 |
| C21-C20  | 2.13 | -17.1 | 1.3955 | 0.6928 | 0.7027 | -17.1 | -14.1 | 14.1 | 0.21 |
| C23-C24  | 2.11 | -17.1 | 1.3905 | 0.6865 | 0.7040 | -16.8 | -14.1 | 13.8 | 0.19 |
| C26-C23  | 2.13 | -17.4 | 1.3914 | 0.6905 | 0.7009 | -17.1 | -14.2 | 13.9 | 0.21 |
| C21-C22  | 2.24 | -19.7 | 1.3781 | 0.6606 | 0.7175 | -18.7 | -14.4 | 13.4 | 0.30 |
| H24-C24  | 1.83 | -16.3 | 1.0834 | 0.3563 | 0.7271 | -18.0 | -17.4 | 19.1 | 0.03 |
| H26-C26  | 1.84 | -16.2 | 1.0834 | 0.3644 | 0.7191 | -17.9 | -17.3 | 19.0 | 0.03 |
| C24-C25  | 2.24 | -19.2 | 1.3829 | 0.6628 | 0.7201 | -18.6 | -14.3 | 13.7 | 0.30 |
| H25-C25  | 1.82 | -15.7 | 1.0833 | 0.3723 | 0.7109 | -18.0 | -16.4 | 18.7 | 0.10 |
| H27-C27  | 1.81 | -15.7 | 1.0833 | 0.3744 | 0.7088 | -17.9 | -16.2 | 18.5 | 0.10 |
| C26-C27  | 2.23 | -19.6 | 1.3790 | 0.6584 | 0.7206 | -18.6 | -14.3 | 13.4 | 0.30 |
| C29-C28  | 2.29 | -21.1 | 1.3839 | 0.6686 | 0.7153 | -18.6 | -15.8 | 13.3 | 0.17 |
| H28-C28  | 1.78 | -15.7 | 1.0833 | 0.3674 | 0.7159 | -17.8 | -16.2 | 18.4 | 0.10 |
| H29-C29  | 1.84 | -16.2 | 1.0835 | 0.3639 | 0.7196 | -17.9 | -17.3 | 19.0 | 0.03 |
| H31-C31  | 1.81 | -16.4 | 1.0834 | 0.3518 | 0.7316 | -17.9 | -17.3 | 18.9 | 0.03 |
| C29-C30  | 2.07 | -16.0 | 1.3821 | 0.6828 | 0.6993 | -16.9 | -12.9 | 13.9 | 0.31 |
| H32-C32  | 1.83 | -15.7 | 1.0833 | 0.3725 | 0.7108 | -18.2 | -16.5 | 18.9 | 0.10 |
| C31-C30  | 2.17 | -17.6 | 1.3899 | 0.6898 | 0.7001 | -17.4 | -14.4 | 14.2 | 0.21 |
| C31-C32  | 2.25 | -19.1 | 1.3824 | 0.6605 | 0.7219 | -18.6 | -14.3 | 13.8 | 0.30 |
| C33-C35  | 1.75 | -10.8 | 1.5083 | 0.7089 | 0.7994 | -11.7 | -10.9 | 11.8 | 0.07 |
| C35-C36  | 2.15 | -17.8 | 1.3911 | 0.6950 | 0.6961 | -16.9 | -13.3 | 12.4 | 0.27 |
| C35-C34  | 2.13 | -17.6 | 1.3930 | 0.6845 | 0.7085 | -16.2 | -13.6 | 12.1 | 0.19 |
| H33A-C33 | 1.80 | -13.5 | 1.0773 | 0.3852 | 0.6922 | -15.9 | -15.1 | 17.5 | 0.05 |
| H33B-C33 | 1.78 | -15.0 | 1.0773 | 0.3612 | 0.7161 | -16.7 | -15.6 | 17.3 | 0.07 |
| H33C-C33 | 1.80 | -14.8 | 1.0771 | 0.3682 | 0.7089 | -16.5 | -15.6 | 17.3 | 0.06 |



|          |      |       |        |        |        |       |       |      |      |
|----------|------|-------|--------|--------|--------|-------|-------|------|------|
| H34-C34  | 1.88 | -14.3 | 1.0830 | 0.3708 | 0.7122 | -17.9 | -16.7 | 20.3 | 0.07 |
| H36-C36  | 1.87 | -14.3 | 1.0831 | 0.3721 | 0.7110 | -17.8 | -16.6 | 20.1 | 0.07 |
| H38-C38  | 1.98 | -20.7 | 1.0830 | 0.3831 | 0.6999 | -19.4 | -18.6 | 17.3 | 0.05 |
| C41-C40  | 2.26 | -19.3 | 1.3810 | 0.6619 | 0.7192 | -18.7 | -14.5 | 13.8 | 0.29 |
| C42-C41  | 2.15 | -17.2 | 1.3941 | 0.6967 | 0.6974 | -17.2 | -14.2 | 14.2 | 0.21 |
| H40-C40  | 1.86 | -15.8 | 1.0833 | 0.3792 | 0.7040 | -18.3 | -16.6 | 19.1 | 0.10 |
| H43-C43  | 1.85 | -16.2 | 1.0834 | 0.3675 | 0.7160 | -18.0 | -17.4 | 19.1 | 0.03 |
| C42-C45  | 1.76 | -10.9 | 1.4865 | 0.7430 | 0.7436 | -13.5 | -11.8 | 14.4 | 0.14 |
| H41-C41  | 1.87 | -16.3 | 1.0834 | 0.3636 | 0.7199 | -18.2 | -17.6 | 19.5 | 0.03 |
| H44-C44  | 1.82 | -15.7 | 1.0833 | 0.3749 | 0.7084 | -18.0 | -16.3 | 18.7 | 0.10 |
| C42-C43  | 2.11 | -17.4 | 1.3864 | 0.6887 | 0.6978 | -16.8 | -14.2 | 13.6 | 0.19 |
| C45-C46  | 2.10 | -16.8 | 1.3932 | 0.6894 | 0.7038 | -16.7 | -14.1 | 13.9 | 0.18 |
| C49-C(45 | 2.14 | -17.1 | 1.3949 | 0.6945 | 0.7004 | -17.1 | -14.2 | 14.1 | 0.21 |
| C43-C44  | 2.22 | -19.2 | 1.3834 | 0.6598 | 0.7236 | -18.5 | -14.2 | 13.5 | 0.30 |
| H46-C46  | 1.89 | -16.3 | 1.0835 | 0.3705 | 0.7130 | -18.2 | -17.6 | 19.5 | 0.04 |
| H49-C49  | 1.87 | -16.2 | 1.0834 | 0.3684 | 0.7150 | -18.1 | -17.5 | 19.4 | 0.03 |
| C46-C47  | 2.25 | -19.3 | 1.3802 | 0.6601 | 0.7201 | -18.6 | -14.4 | 13.7 | 0.30 |
| H47-C47  | 1.87 | -15.8 | 1.0833 | 0.3841 | 0.6992 | -18.3 | -16.6 | 19.1 | 0.10 |
| H48-C48  | 1.85 | -15.7 | 1.0833 | 0.3785 | 0.7048 | -18.2 | -16.5 | 18.9 | 0.10 |
| C49-C48  | 2.25 | -19.4 | 1.3803 | 0.6593 | 0.7210 | -18.6 | -14.4 | 13.6 | 0.29 |
| C53-C52  | 2.13 | -17.8 | 1.3911 | 0.6847 | 0.7064 | -16.7 | -13.2 | 12.1 | 0.27 |
| C50-C53  | 1.83 | -11.7 | 1.5088 | 0.7385 | 0.7704 | -12.6 | -11.2 | 12.1 | 0.12 |
| C53-C54  | 2.10 | -17.7 | 1.3920 | 0.6776 | 0.7144 | -16.0 | -13.5 | 11.8 | 0.19 |
| H50A-C50 | 1.73 | -13.1 | 1.0773 | 0.4193 | 0.6579 | -14.8 | -14.0 | 15.8 | 0.06 |
| H50B-C50 | 1.76 | -14.7 | 1.0771 | 0.3663 | 0.7109 | -16.2 | -15.3 | 16.8 | 0.06 |
| H50C-C50 | 1.74 | -13.5 | 1.0773 | 0.3776 | 0.6997 | -15.6 | -14.7 | 16.9 | 0.06 |
| H52-C52  | 1.88 | -14.3 | 1.0830 | 0.3725 | 0.7105 | -17.9 | -16.7 | 20.3 | 0.07 |
| H54-C54  | 1.82 | -14.3 | 1.0830 | 0.3602 | 0.7229 | -17.7 | -16.5 | 19.8 | 0.07 |
| H56-C56  | 1.97 | -20.7 | 1.0830 | 0.3780 | 0.7051 | -19.4 | -18.6 | 17.3 | 0.05 |
| C58-C57  | 2.12 | -17.1 | 1.3913 | 0.6906 | 0.7007 | -16.8 | -14.2 | 13.9 | 0.19 |
| C58-C61  | 1.79 | -10.9 | 1.4858 | 0.7415 | 0.7443 | -13.8 | -11.8 | 14.6 | 0.17 |
| C57-C66  | 2.25 | -19.7 | 1.3793 | 0.6620 | 0.7173 | -18.7 | -14.5 | 13.5 | 0.29 |
| H57-C57  | 1.83 | -16.3 | 1.0834 | 0.3574 | 0.7260 | -18.0 | -17.4 | 19.1 | 0.03 |
| H60-C60  | 1.84 | -15.7 | 1.0833 | 0.3787 | 0.7046 | -18.1 | -16.4 | 18.8 | 0.10 |
| H66-C66  | 1.76 | -15.7 | 1.0833 | 0.3625 | 0.7207 | -17.7 | -16.1 | 18.2 | 0.10 |
| C59-C58  | 2.15 | -17.4 | 1.3916 | 0.6904 | 0.7013 | -17.2 | -14.3 | 14.1 | 0.21 |
| C61-C62  | 2.12 | -17.1 | 1.3900 | 0.6939 | 0.6961 | -16.8 | -14.2 | 13.9 | 0.18 |
| C64-C61  | 2.17 | -17.3 | 1.3934 | 0.6930 | 0.7004 | -17.3 | -14.3 | 14.3 | 0.21 |
| H59-C59  | 1.84 | -16.3 | 1.0834 | 0.3618 | 0.7217 | -18.0 | -17.4 | 19.1 | 0.03 |
| C59-C60  | 2.25 | -19.6 | 1.3784 | 0.6592 | 0.7192 | -18.7 | -14.4 | 13.5 | 0.30 |
| H62-C62  | 1.84 | -16.2 | 1.0834 | 0.3625 | 0.7210 | -17.9 | -17.3 | 19.0 | 0.03 |
| H64-C64  | 1.83 | -16.4 | 1.0834 | 0.3531 | 0.7303 | -18.1 | -17.5 | 19.1 | 0.03 |

|         |      |       |        |        |        |       |       |      |      |
|---------|------|-------|--------|--------|--------|-------|-------|------|------|
| C62–C63 | 2.23 | −19.3 | 1.3832 | 0.6599 | 0.7233 | −18.5 | −14.3 | 13.5 | 0.30 |
| H63–C63 | 1.81 | −15.7 | 1.0833 | 0.3708 | 0.7124 | −18.0 | −16.3 | 18.6 | 0.10 |
| H65–C65 | 1.87 | −15.8 | 1.0833 | 0.3818 | 0.7015 | −18.4 | −16.6 | 19.2 | 0.10 |
| C64–C65 | 2.28 | −19.6 | 1.3781 | 0.6597 | 0.7184 | −18.9 | −14.6 | 13.8 | 0.30 |

**Table 11:** Topological values at the *bcp* for intramolecular bonding region obtained from SBFA modeled data for Form **V**

| Bond    | $\rho$ | $\nabla^2\rho$ | $R_{ij}$ | $d_1$  | $d_2$  | $\lambda_1$ | $\lambda_2$ | $\lambda_3$ | $\epsilon$ |
|---------|--------|----------------|----------|--------|--------|-------------|-------------|-------------|------------|
| C54–C55 | 2.23   | −19.1          | 1.3900   | 0.6705 | 0.7195 | −18.6       | −14.7       | 14.2        | 0.26       |
| C55–O1  | 2.13   | −13.1          | 1.3685   | 0.5789 | 0.7895 | −18.3       | −16.1       | 21.4        | 0.13       |
| C56–C55 | 2.17   | −18.0          | 1.3942   | 0.6816 | 0.7126 | −18.1       | −14.1       | 14.2        | 0.29       |
| H10–O1  | 2.31   | −33.9          | 0.9921   | 0.2376 | 0.7545 | −35.9       | −34.8       | 36.8        | 0.03       |
| C58–C57 | 2.20   | −18.6          | 1.3974   | 0.6679 | 0.7294 | −18.2       | −14.4       | 14.1        | 0.26       |
| C56–C57 | 2.16   | −17.7          | 1.3930   | 0.6761 | 0.7169 | −18.1       | −13.8       | 14.2        | 0.32       |
| C57–O2  | 2.13   | −12.7          | 1.3707   | 0.5826 | 0.7882 | −18.3       | −16.1       | 21.7        | 0.14       |
| H20–O2  | 2.43   | −30.4          | 0.9921   | 0.2518 | 0.7403 | −35.8       | −34.7       | 40.0        | 0.03       |
| C39–O3  | 2.08   | −13.5          | 1.3713   | 0.5739 | 0.7975 | −18.0       | −15.9       | 20.4        | 0.13       |
| C40–C39 | 2.18   | −18.9          | 1.3887   | 0.6896 | 0.6991 | −18.4       | −14.4       | 13.8        | 0.28       |
| C38–C39 | 2.20   | −18.8          | 1.3932   | 0.6811 | 0.7122 | −18.4       | −14.4       | 14.1        | 0.28       |
| H30–O3  | 2.20   | −38.0          | 0.9921   | 0.2215 | 0.7706 | −36.2       | −35.3       | 33.5        | 0.03       |
| C38–C43 | 2.16   | −17.9          | 1.3902   | 0.6794 | 0.7108 | −18.1       | −13.8       | 14.1        | 0.31       |
| C42–C43 | 2.17   | −18.0          | 1.3943   | 0.6664 | 0.7280 | −18.1       | −13.8       | 14.0        | 0.31       |
| C43–O4  | 2.10   | −12.8          | 1.3717   | 0.5814 | 0.7903 | −18.1       | −15.9       | 21.2        | 0.14       |
| H40–O4  | 2.34   | −32.6          | 0.9921   | 0.2424 | 0.7496 | −35.7       | −34.6       | 37.6        | 0.03       |
| C45–C50 | 2.17   | −17.8          | 1.3925   | 0.6800 | 0.7124 | −18.2       | −13.8       | 14.3        | 0.31       |
| C49–C50 | 2.18   | −18.1          | 1.3939   | 0.6651 | 0.7287 | −18.2       | −13.9       | 14.1        | 0.31       |
| C50–O5  | 2.09   | −11.8          | 1.3786   | 0.5894 | 0.7892 | −17.9       | −15.7       | 21.8        | 0.14       |
| H50–O5  | 2.33   | −32.7          | 0.9921   | 0.2419 | 0.7502 | −35.6       | −34.6       | 37.5        | 0.03       |
| C46–O6  | 2.10   | −12.7          | 1.3735   | 0.5816 | 0.7919 | −18.0       | −15.9       | 21.2        | 0.14       |
| C47–C46 | 2.21   | −18.8          | 1.3933   | 0.6721 | 0.7212 | −18.4       | −14.5       | 14.0        | 0.26       |
| C45–C46 | 2.18   | −18.1          | 1.3938   | 0.6873 | 0.7065 | −18.2       | −14.2       | 14.2        | 0.28       |
| H60–O6  | 2.33   | −33.2          | 0.9921   | 0.2402 | 0.7518 | −35.8       | −34.7       | 37.4        | 0.03       |
| C12–O7  | 2.13   | −12.3          | 1.3715   | 0.5854 | 0.7861 | −18.2       | −16.0       | 21.9        | 0.14       |
| C13–C12 | 2.21   | −18.8          | 1.3908   | 0.6776 | 0.7132 | −18.4       | −14.5       | 14.1        | 0.27       |
| C11–C12 | 2.22   | −18.7          | 1.3951   | 0.6691 | 0.7260 | −18.4       | −14.5       | 14.3        | 0.27       |
| H70–O7  | 2.39   | −31.4          | 0.9921   | 0.2474 | 0.7447 | −35.7       | −34.6       | 38.8        | 0.03       |
| C11–C16 | 2.17   | −18.1          | 1.3886   | 0.6729 | 0.7157 | −18.2       | −13.9       | 14.0        | 0.31       |
| C15–C16 | 2.21   | −18.7          | 1.3961   | 0.6685 | 0.7276 | −18.3       | −14.5       | 14.1        | 0.26       |
| C16–O8  | 2.14   | −12.7          | 1.3712   | 0.5819 | 0.7894 | −18.3       | −16.1       | 21.7        | 0.14       |
| H80–O8  | 2.39   | −32.0          | 0.9921   | 0.2454 | 0.7466 | −36.0       | −34.9       | 38.9        | 0.03       |

|          |      |       |        |        |        |       |       |      |      |
|----------|------|-------|--------|--------|--------|-------|-------|------|------|
| C28-N1   | 2.43 | -20.6 | 1.3380 | 0.5819 | 0.7561 | -21.1 | -17.3 | 17.8 | 0.22 |
| C32-N1   | 2.39 | -18.7 | 1.3411 | 0.5944 | 0.7467 | -20.7 | -16.8 | 18.8 | 0.23 |
| C35-N2   | 2.40 | -19.2 | 1.3407 | 0.5901 | 0.7506 | -20.8 | -16.8 | 18.5 | 0.24 |
| C36-N2   | 2.46 | -20.5 | 1.3381 | 0.5845 | 0.7536 | -21.3 | -17.5 | 18.3 | 0.22 |
| C18-N3   | 2.46 | -20.3 | 1.3389 | 0.5855 | 0.7533 | -21.2 | -17.5 | 18.4 | 0.22 |
| C22-N3   | 2.38 | -18.9 | 1.3428 | 0.5906 | 0.7522 | -20.7 | -16.7 | 18.4 | 0.24 |
| C25-N4   | 2.45 | -20.3 | 1.3306 | 0.5826 | 0.7480 | -21.3 | -17.2 | 18.2 | 0.24 |
| C26-N4   | 2.53 | -23.7 | 1.3154 | 0.5606 | 0.7548 | -22.2 | -18.2 | 16.7 | 0.22 |
| C59-N5   | 2.40 | -17.9 | 1.3488 | 0.6000 | 0.7488 | -20.6 | -16.7 | 19.4 | 0.23 |
| C63-N5   | 2.46 | -20.2 | 1.3412 | 0.5856 | 0.7556 | -21.2 | -17.4 | 18.5 | 0.22 |
| C66-N6   | 2.42 | -19.9 | 1.3434 | 0.5877 | 0.7557 | -21.0 | -17.2 | 18.3 | 0.22 |
| C67-N6   | 2.40 | -18.6 | 1.3433 | 0.5955 | 0.7477 | -20.7 | -16.8 | 18.9 | 0.24 |
| H66-C66  | 1.81 | -15.7 | 1.0833 | 0.3716 | 0.7117 | -18.0 | -16.3 | 18.6 | 0.10 |
| C8-N7    | 2.48 | -22.5 | 1.3247 | 0.5691 | 0.7556 | -21.8 | -17.8 | 17.1 | 0.22 |
| C10-N7   | 2.44 | -20.2 | 1.3292 | 0.5824 | 0.7469 | -21.2 | -17.2 | 18.1 | 0.23 |
| H9-C9    | 1.77 | -16.7 | 1.0834 | 0.3367 | 0.7468 | -17.9 | -17.4 | 18.6 | 0.03 |
| C1-N8    | 2.48 | -20.8 | 1.3338 | 0.5819 | 0.7519 | -21.4 | -17.6 | 18.2 | 0.21 |
| C5-N8    | 2.48 | -19.9 | 1.3309 | 0.5894 | 0.7415 | -21.4 | -17.4 | 18.9 | 0.23 |
| H2-C2    | 1.74 | -16.9 | 1.0834 | 0.3306 | 0.7528 | -17.9 | -17.3 | 18.3 | 0.03 |
| H5-C5    | 1.72 | -16.1 | 1.0832 | 0.3386 | 0.7446 | -17.8 | -16.3 | 18.0 | 0.09 |
| C2-C1    | 2.32 | -21.0 | 1.3799 | 0.6715 | 0.7084 | -18.8 | -16.0 | 13.7 | 0.18 |
| C2-C3    | 2.13 | -16.8 | 1.3719 | 0.6857 | 0.6862 | -17.4 | -13.3 | 13.9 | 0.30 |
| H1-C1    | 1.73 | -15.9 | 1.0832 | 0.3480 | 0.7352 | -17.7 | -16.2 | 18.0 | 0.09 |
| H4-C4    | 1.74 | -16.9 | 1.0834 | 0.3286 | 0.7548 | -17.9 | -17.4 | 18.3 | 0.03 |
| C6-C3    | 1.78 | -10.9 | 1.4849 | 0.7422 | 0.7427 | -13.8 | -11.7 | 14.6 | 0.18 |
| C3-C4    | 2.20 | -17.9 | 1.3840 | 0.6915 | 0.6925 | -17.6 | -14.6 | 14.3 | 0.20 |
| C7-C6    | 2.20 | -18.3 | 1.3780 | 0.6853 | 0.6927 | -17.6 | -14.6 | 14.0 | 0.20 |
| C6-C9    | 2.12 | -16.4 | 1.3753 | 0.6875 | 0.6878 | -17.2 | -13.2 | 14.0 | 0.30 |
| C4-C5    | 2.27 | -19.0 | 1.3850 | 0.6629 | 0.7221 | -18.7 | -14.5 | 14.1 | 0.29 |
| H7-C7    | 1.74 | -16.7 | 1.0834 | 0.3330 | 0.7504 | -17.7 | -17.2 | 18.2 | 0.03 |
| C7-C8    | 2.26 | -19.9 | 1.3770 | 0.6629 | 0.7141 | -18.7 | -14.6 | 13.5 | 0.28 |
| H8-C8    | 1.75 | -15.7 | 1.0833 | 0.3602 | 0.7231 | -17.6 | -16.0 | 18.0 | 0.10 |
| H10-C10  | 1.75 | -15.7 | 1.0833 | 0.3584 | 0.7248 | -17.7 | -16.1 | 18.0 | 0.10 |
| C9-C10   | 2.34 | -21.8 | 1.3761 | 0.6723 | 0.7038 | -19.0 | -16.2 | 13.4 | 0.17 |
| H11-C11  | 1.86 | -14.3 | 1.0830 | 0.3681 | 0.7149 | -17.8 | -16.6 | 20.1 | 0.07 |
| C14-C13  | 2.16 | -17.8 | 1.3900 | 0.6949 | 0.6952 | -17.0 | -13.3 | 12.4 | 0.28 |
| H15-C15  | 1.98 | -19.4 | 1.0831 | 0.4107 | 0.6724 | -18.7 | -17.7 | 17.0 | 0.06 |
| H13-C13  | 2.00 | -19.4 | 1.0831 | 0.4085 | 0.6746 | -18.9 | -17.9 | 17.4 | 0.06 |
| C14-C15  | 2.10 | -17.1 | 1.3975 | 0.6945 | 0.7029 | -15.9 | -13.3 | 12.1 | 0.20 |
| C17-C14  | 1.76 | -10.5 | 1.5168 | 0.7180 | 0.7988 | -11.8 | -10.6 | 11.9 | 0.11 |
| H17A-C17 | 1.88 | -18.3 | 1.0771 | 0.3886 | 0.6884 | -18.0 | -15.9 | 15.6 | 0.13 |
| H17B-C17 | 1.66 | -11.6 | 1.0773 | 0.3801 | 0.6972 | -15.1 | -13.5 | 17.0 | 0.12 |

|          |      |       |        |        |        |       |       |      |      |
|----------|------|-------|--------|--------|--------|-------|-------|------|------|
| H17C-C17 | 1.71 | -11.9 | 1.0774 | 0.3788 | 0.6986 | -15.6 | -13.6 | 17.3 | 0.15 |
| C19-C18  | 2.24 | -19.3 | 1.3831 | 0.6591 | 0.7240 | -18.6 | -14.3 | 13.6 | 0.30 |
| C19-C20  | 2.16 | -17.4 | 1.3903 | 0.6875 | 0.7028 | -17.3 | -14.3 | 14.2 | 0.20 |
| H18-C18  | 1.83 | -15.7 | 1.0833 | 0.3731 | 0.7102 | -18.1 | -16.5 | 18.9 | 0.10 |
| H21-C21  | 1.82 | -16.4 | 1.0834 | 0.3534 | 0.7300 | -18.0 | -17.4 | 19.0 | 0.03 |
| C20-C23  | 1.79 | -10.7 | 1.4901 | 0.7420 | 0.7481 | -13.8 | -11.7 | 14.8 | 0.18 |
| H19-C19  | 1.86 | -16.2 | 1.0834 | 0.3661 | 0.7174 | -18.0 | -17.5 | 19.3 | 0.03 |
| H22-C22  | 1.83 | -15.7 | 1.0833 | 0.3825 | 0.7008 | -18.0 | -16.3 | 18.6 | 0.11 |
| C21-C20  | 2.09 | -15.8 | 1.3850 | 0.6879 | 0.6970 | -16.9 | -13.0 | 14.1 | 0.30 |
| C24-C23  | 2.15 | -16.8 | 1.3746 | 0.6657 | 0.7089 | -17.7 | -13.2 | 14.1 | 0.33 |
| C27-C23  | 2.14 | -16.7 | 1.3723 | 0.6793 | 0.6930 | -17.4 | -13.4 | 14.1 | 0.30 |
| C21-C22  | 2.29 | -20.9 | 1.3852 | 0.6759 | 0.7093 | -18.6 | -15.8 | 13.5 | 0.18 |
| H24-C24  | 1.75 | -16.5 | 1.0834 | 0.3431 | 0.7403 | -17.6 | -17.1 | 18.2 | 0.03 |
| H27-C27  | 1.80 | -16.5 | 1.0834 | 0.3472 | 0.7362 | -18.0 | -17.4 | 18.9 | 0.03 |
| C24-C25  | 2.28 | -20.9 | 1.3856 | 0.6684 | 0.7171 | -18.5 | -15.8 | 13.4 | 0.17 |
| H25-C25  | 1.72 | -15.8 | 1.0832 | 0.3496 | 0.7336 | -17.6 | -16.1 | 17.8 | 0.10 |
| H26-C26  | 1.69 | -15.9 | 1.0832 | 0.3441 | 0.7391 | -17.4 | -15.9 | 17.5 | 0.09 |
| C27-C26  | 2.30 | -20.9 | 1.3836 | 0.6753 | 0.7084 | -18.6 | -15.9 | 13.6 | 0.18 |
| C29-C28  | 2.23 | -19.2 | 1.3818 | 0.6654 | 0.7164 | -18.5 | -14.3 | 13.6 | 0.29 |
| C30-C29  | 2.13 | -17.2 | 1.3939 | 0.6956 | 0.6983 | -17.1 | -14.1 | 14.1 | 0.21 |
| H28-C28  | 1.87 | -15.8 | 1.0833 | 0.3902 | 0.6931 | -18.2 | -16.4 | 18.8 | 0.11 |
| H31-C31  | 1.89 | -16.3 | 1.0835 | 0.3700 | 0.7135 | -18.2 | -17.6 | 19.6 | 0.03 |
| C30-C33  | 1.76 | -10.8 | 1.4891 | 0.7403 | 0.7488 | -13.6 | -11.6 | 14.4 | 0.18 |
| H29-C29  | 1.90 | -16.3 | 1.0835 | 0.3733 | 0.7102 | -18.3 | -17.7 | 19.7 | 0.03 |
| H32-C32  | 1.90 | -15.9 | 1.0833 | 0.3935 | 0.6898 | -18.4 | -16.6 | 19.1 | 0.11 |
| C30-C31  | 2.04 | -15.3 | 1.3888 | 0.6927 | 0.6961 | -16.6 | -12.7 | 14.0 | 0.30 |
| C33-C34  | 2.11 | -16.8 | 1.3957 | 0.6948 | 0.7009 | -16.7 | -14.0 | 13.9 | 0.19 |
| C37-C33  | 2.15 | -17.1 | 1.3948 | 0.6941 | 0.7007 | -17.1 | -14.3 | 14.3 | 0.20 |
| C31-C32  | 2.28 | -20.5 | 1.3882 | 0.6751 | 0.7131 | -18.4 | -15.7 | 13.7 | 0.17 |
| H34-C34  | 1.92 | -16.3 | 1.0835 | 0.3793 | 0.7042 | -18.3 | -17.7 | 19.7 | 0.04 |
| H37-C37  | 1.85 | -16.3 | 1.0834 | 0.3606 | 0.7228 | -18.1 | -17.5 | 19.3 | 0.03 |
| C34-C35  | 2.23 | -19.2 | 1.3839 | 0.6633 | 0.7206 | -18.5 | -14.3 | 13.6 | 0.29 |
| H35-C35  | 1.85 | -15.8 | 1.0833 | 0.3839 | 0.6994 | -18.2 | -16.4 | 18.8 | 0.11 |
| H36-C36  | 1.88 | -15.8 | 1.0833 | 0.3836 | 0.6996 | -18.3 | -16.6 | 19.2 | 0.10 |
| C37-C36  | 2.23 | -18.6 | 1.3897 | 0.6659 | 0.7238 | -18.4 | -14.2 | 13.9 | 0.29 |
| H38-C38  | 1.90 | -14.4 | 1.0831 | 0.3745 | 0.7086 | -18.1 | -16.9 | 20.6 | 0.07 |
| C41-C40  | 2.17 | -17.9 | 1.3898 | 0.6932 | 0.6966 | -17.0 | -13.3 | 12.4 | 0.28 |
| H42-C42  | 1.93 | -19.4 | 1.0831 | 0.3969 | 0.6862 | -18.6 | -17.6 | 16.8 | 0.06 |
| H40-C40  | 1.97 | -19.5 | 1.0831 | 0.3973 | 0.6858 | -18.9 | -17.9 | 17.3 | 0.06 |
| C41-C42  | 2.15 | -18.1 | 1.3919 | 0.6857 | 0.7063 | -16.2 | -14.0 | 12.1 | 0.16 |
| C44-C41  | 1.76 | -10.4 | 1.5182 | 0.7177 | 0.8005 | -11.7 | -10.7 | 11.9 | 0.09 |
| H44A-C44 | 1.87 | -17.9 | 1.0772 | 0.3881 | 0.6891 | -17.8 | -15.8 | 15.8 | 0.13 |

|          |      |       |        |        |        |       |       |      |      |
|----------|------|-------|--------|--------|--------|-------|-------|------|------|
| H44B-C44 | 1.70 | -12.2 | 1.0771 | 0.3759 | 0.7012 | -15.7 | -13.7 | 17.2 | 0.15 |
| H44C-C44 | 1.68 | -11.7 | 1.0773 | 0.3839 | 0.6933 | -15.1 | -13.5 | 16.9 | 0.12 |
| H45-C45  | 1.90 | -14.4 | 1.0831 | 0.3722 | 0.7109 | -18.1 | -16.9 | 20.7 | 0.07 |
| C47-C48  | 2.15 | -17.7 | 1.3915 | 0.6934 | 0.6982 | -16.8 | -13.2 | 12.3 | 0.27 |
| H49-C49  | 1.93 | -19.5 | 1.0831 | 0.3945 | 0.6886 | -18.7 | -17.7 | 16.9 | 0.06 |
| H47-C47  | 1.97 | -19.4 | 1.0831 | 0.4061 | 0.6770 | -18.8 | -17.7 | 17.1 | 0.06 |
| C48-C49  | 2.14 | -17.9 | 1.3953 | 0.6845 | 0.7108 | -16.1 | -13.9 | 12.1 | 0.16 |
| C51-C48  | 1.75 | -10.4 | 1.5120 | 0.7136 | 0.7985 | -11.2 | -11.1 | 11.9 | 0.01 |
| H51A-C51 | 1.83 | -17.6 | 1.0772 | 0.3953 | 0.6819 | -17.3 | -15.5 | 15.2 | 0.11 |
| H51B-C51 | 1.70 | -12.2 | 1.0771 | 0.3769 | 0.7002 | -15.6 | -13.6 | 17.1 | 0.15 |
| H51C-C51 | 1.70 | -11.8 | 1.0776 | 0.3803 | 0.6973 | -15.6 | -13.4 | 17.2 | 0.16 |
| C52-C53  | 1.76 | -10.8 | 1.5076 | 0.7128 | 0.7948 | -11.4 | -11.2 | 11.8 | 0.02 |
| C53-C54  | 2.15 | -17.6 | 1.3930 | 0.6945 | 0.6986 | -16.8 | -13.2 | 12.4 | 0.27 |
| C53-C58  | 2.08 | -16.9 | 1.4004 | 0.6950 | 0.7054 | -15.8 | -13.2 | 12.1 | 0.20 |
| H52A-C52 | 1.87 | -18.2 | 1.0771 | 0.3898 | 0.6872 | -17.9 | -15.8 | 15.5 | 0.13 |
| H52B-C52 | 1.68 | -11.5 | 1.0779 | 0.3768 | 0.7011 | -15.5 | -13.3 | 17.3 | 0.16 |
| H52C-C52 | 1.67 | -11.7 | 1.0773 | 0.3854 | 0.6919 | -15.1 | -13.4 | 16.8 | 0.12 |
| H54-C54  | 1.96 | -19.4 | 1.0831 | 0.3995 | 0.6836 | -18.8 | -17.8 | 17.2 | 0.06 |
| H56-C56  | 1.87 | -14.3 | 1.0831 | 0.3683 | 0.7147 | -17.9 | -16.7 | 20.2 | 0.07 |
| H58-C58  | 1.92 | -19.4 | 1.0831 | 0.3962 | 0.6869 | -18.5 | -17.5 | 16.6 | 0.06 |
| C60-C59  | 2.25 | -19.4 | 1.3816 | 0.6570 | 0.7246 | -18.7 | -14.4 | 13.7 | 0.30 |
| C61-C60  | 2.13 | -17.1 | 1.3896 | 0.6931 | 0.6965 | -16.8 | -14.2 | 13.9 | 0.18 |
| H59-C59  | 1.80 | -15.8 | 1.0833 | 0.3622 | 0.7210 | -18.0 | -16.4 | 18.7 | 0.10 |
| H60-C60  | 1.82 | -16.3 | 1.0834 | 0.3570 | 0.7264 | -17.9 | -17.3 | 19.0 | 0.03 |
| H61-C62  | 1.86 | -16.3 | 1.0834 | 0.3610 | 0.7224 | -18.2 | -17.6 | 19.5 | 0.03 |
| C61-C64  | 1.79 | -10.7 | 1.4908 | 0.7432 | 0.7476 | -13.6 | -11.8 | 14.8 | 0.15 |
| H63-C63  | 1.83 | -15.7 | 1.0833 | 0.3716 | 0.7117 | -18.1 | -16.4 | 18.8 | 0.10 |
| C62-C61  | 2.17 | -17.3 | 1.3920 | 0.6923 | 0.6997 | -17.3 | -14.4 | 14.4 | 0.20 |
| C65-C64  | 2.15 | -16.9 | 1.3961 | 0.6880 | 0.7081 | -17.1 | -14.2 | 14.3 | 0.20 |
| C64-C68  | 2.13 | -16.7 | 1.3963 | 0.6970 | 0.6993 | -16.8 | -14.1 | 14.2 | 0.19 |
| C62-C63  | 2.26 | -19.2 | 1.3830 | 0.6635 | 0.7195 | -18.7 | -14.4 | 13.9 | 0.29 |
| H65-C65  | 1.80 | -16.3 | 1.0834 | 0.3527 | 0.7308 | -17.8 | -17.3 | 18.7 | 0.03 |
| H68-C68  | 1.84 | -16.3 | 1.0834 | 0.3589 | 0.7245 | -18.0 | -17.5 | 19.2 | 0.03 |
| C65-C66  | 2.22 | -18.9 | 1.3846 | 0.6618 | 0.7228 | -18.4 | -14.2 | 13.7 | 0.30 |
| H67-C67  | 1.88 | -15.8 | 1.0833 | 0.3860 | 0.6973 | -18.3 | -16.6 | 19.1 | 0.11 |
| C68-C67  | 2.24 | -19.1 | 1.3836 | 0.6631 | 0.7206 | -18.6 | -14.3 | 13.8 | 0.30 |

**Scheme 1:** Supramolecular synthons and the corresponding in-house SBFA library entry.

| Synthon | Charge density SBFA library |
|---------|-----------------------------|
|---------|-----------------------------|

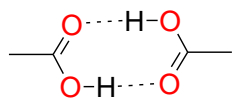

- (a) 4-Methoxybenzoic acid (Hathwar *et al.*, 2011)
- (b) 4-Methylbenzoic acid (Hathwar *et al.*, 2011)
- (c) 4-(Acetylamino)benzoic acid (Hathwar *et al.*, 2011)
- (d) 4-Fluorobenzoic acid (Hathwar *et al.*, 2011)

---

**Carboxylic acid O-H...O dimer synthon**

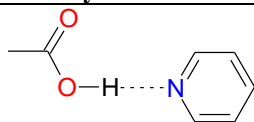

Salicylic acid-nicotinamide cocrystal (Hathwar *et al.*, 2010)

---

**Carboxylic acid-pyridine O-H...N synthon**

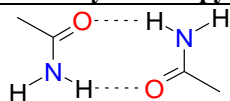

4-Fluorobenzamide (Hathwar & Guru Row, 2011)

---

**Amide dimer N-H...O synthon**

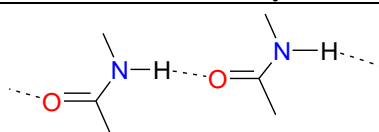

- (a) 4-(Acetylamino)benzoic acid (Hathwar *et al.*, 2011)
- (b) 4-Methylacetanilide (Hathwar *et al.*, 2011)

---

**Amide infinite chain**

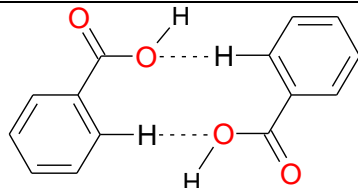

- (a) 4-(Acetylamino)benzoic acid (Hathwar *et al.*, 2011)
- (b) 4-Fluorobenzoic acid (Hathwar *et al.*, 2011)

---

**C-H...O dimer synthon**

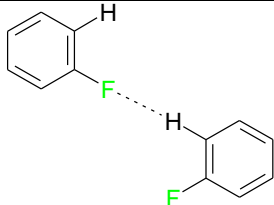

4-Fluorobenzoic acid (Hathwar *et al.*, 2011)

---

**C-H...F infinite chain**

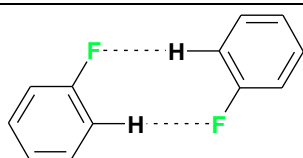

2-Chloro-4-fluoro-benzoic acid (Hathwar & Guru Row, 2011)

---

**C-H...F dimer**

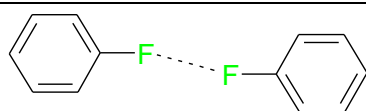

4-Fluorobenzamide (Hathwar & Guru Row, 2011)

---

**F...F interaction**

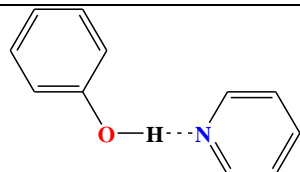

4-hydroxybenzoic acid-isonicotinamide cocrystal (present study)

---

**Phenol-pyridine O-H...N synthon**

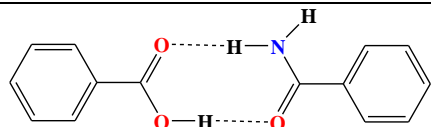

4-hydroxybenzoic acid–isonicotinamide cocrystal (present study)

**Carboxylic acid–amide hetero dimer synthon**

---

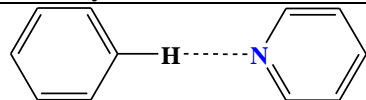

(2-chloroquinolin-3-yl)methanol (Hathwar & Guru Row, 2010)

**C–H...N interaction**

---

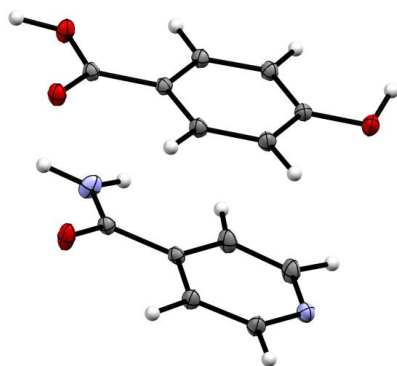

(a)

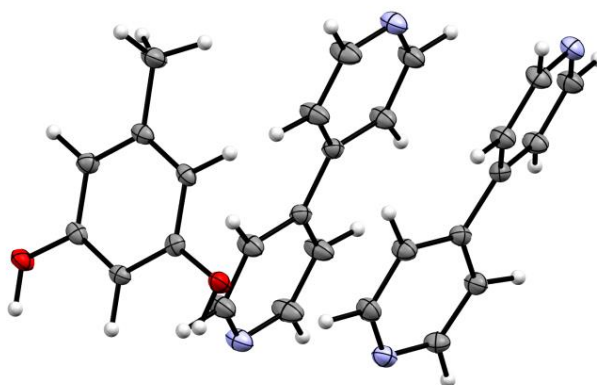

(b)

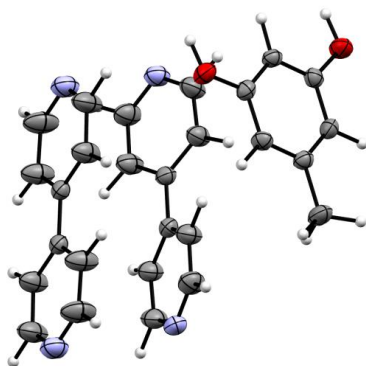

(c)

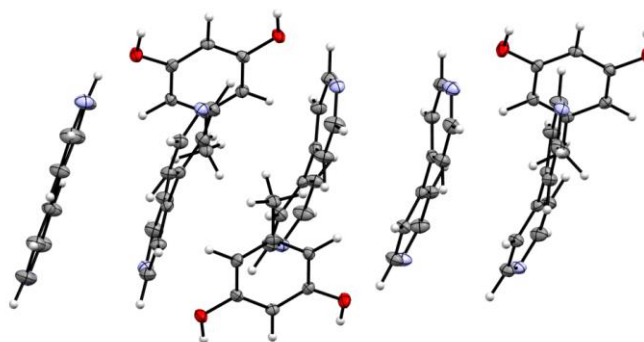

(d)

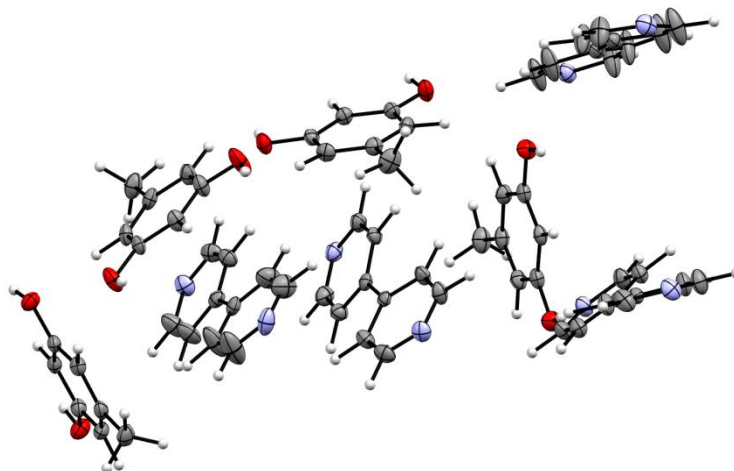

(e)

**Fig. 1:** ORTEP diagrams for the asymmetric unit of the crystal structures (ellipsoids are drawn at 50% probability) (a) 4-Hydroxybenzoic acid:Isonicotinamide (b) Form **II** (c) Form **III** (d) Form **IV** (e) Form **V**

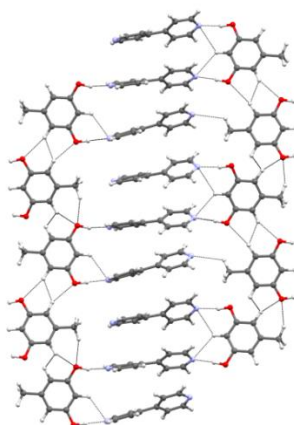

(a)

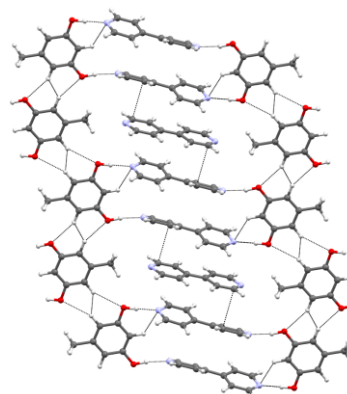

(b)



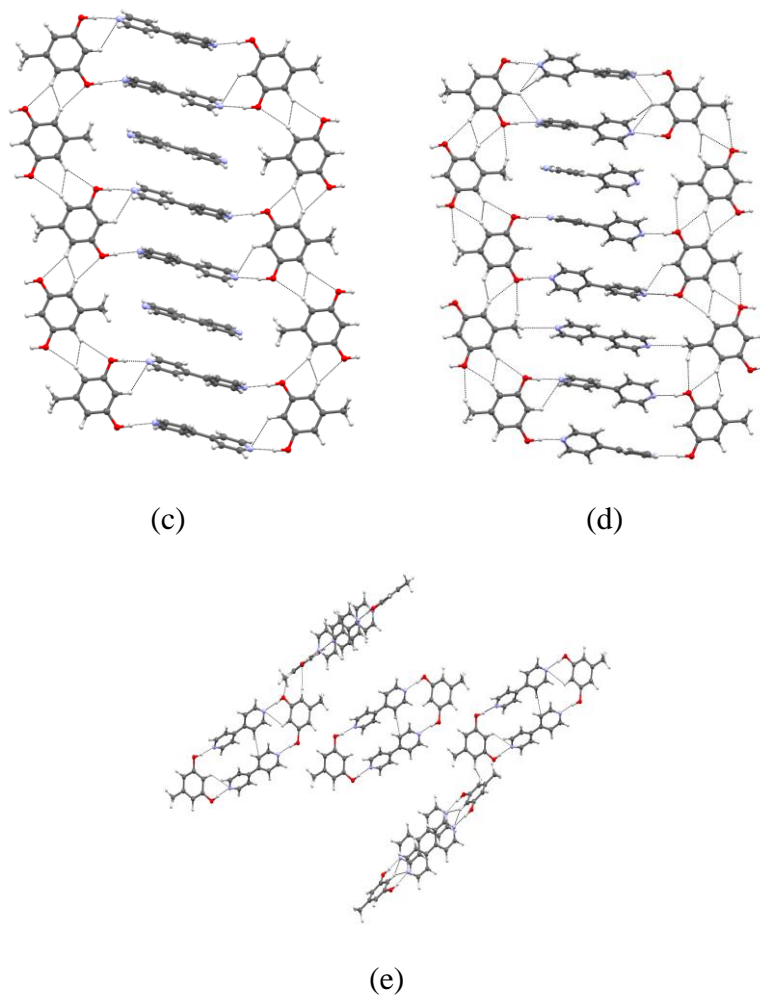

**Fig. 2:** Packing diagrams for (a) Form I; (b) Form II; (c) Form III; (d) Form IV; (e) Form V

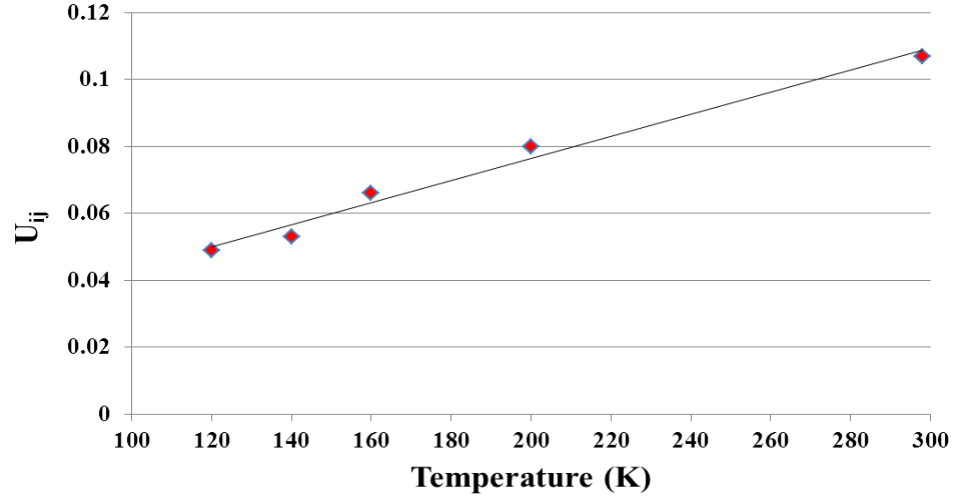

**Fig. 3:** Variation of  $U_{ij}$  with temperature in Form III

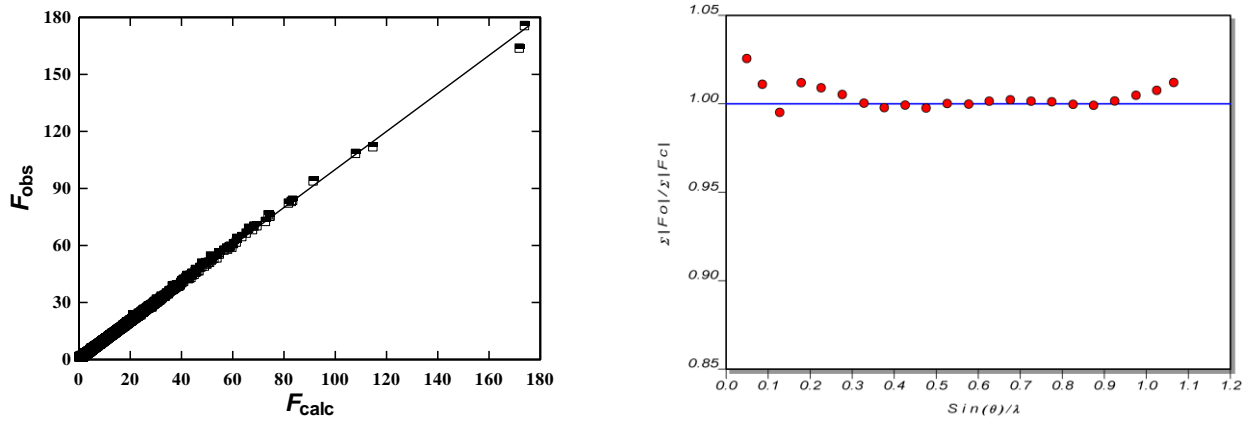

**Fig. 4:** Scatter plot depicting the variation of  $F_{obs}$  with  $F_{cal}$  for **4HYINA** (left) Variation of  $F_{obs}/F_{cal}$  with  $(\sin\theta)/\lambda$  (right)

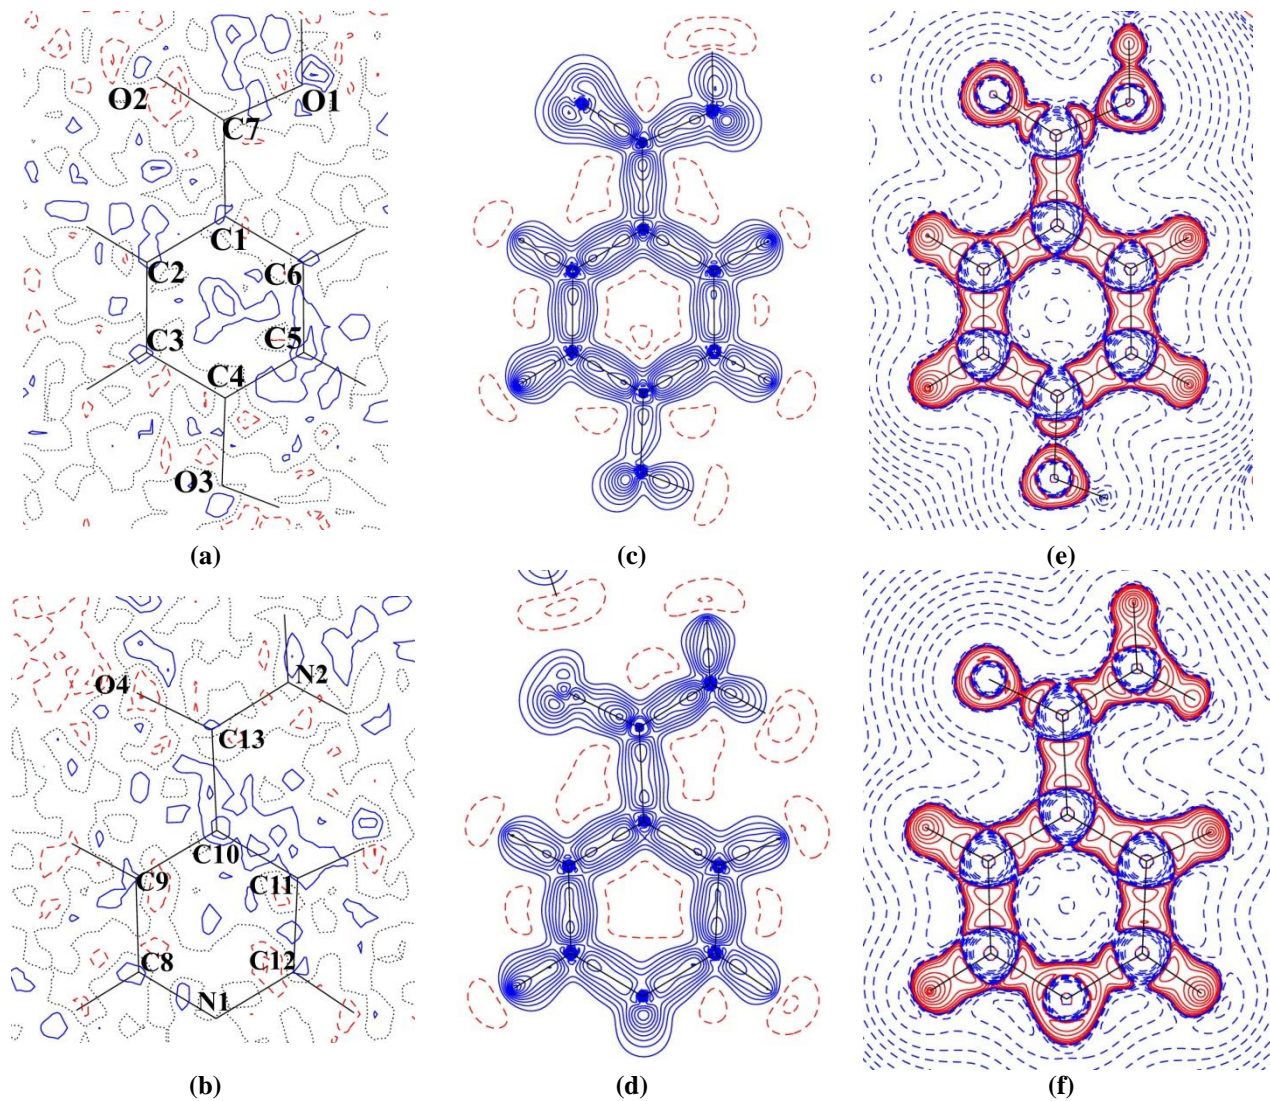

**Fig. 5:** (a, b) Experimental residual density (c, d) deformation density (e, f) Laplacian maps of 4-hydroxybenzoic acid: Isonicotinamide. Residual density contours are drawn at the intervals of  $\pm 0.05 \text{ e } \text{\AA}^{-3}$ . Deformation density contours are drawn at the intervals of  $\pm 0.1 \text{ e } \text{\AA}^{-3}$ . Laplacian plotted on logarithmic contours.

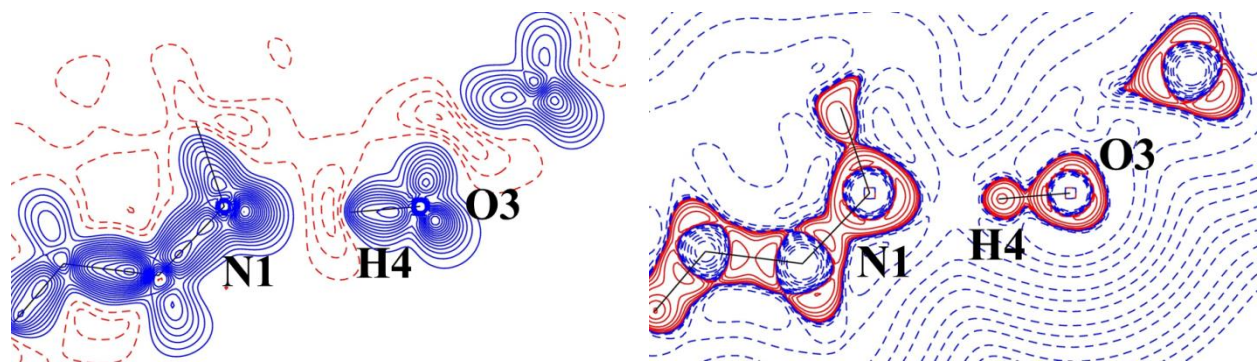

**Fig. 6:** Deformation density and Laplacian maps of intermolecular O–H···N synthon in 4-hydroxybenzoic acid: Isonicotinamide

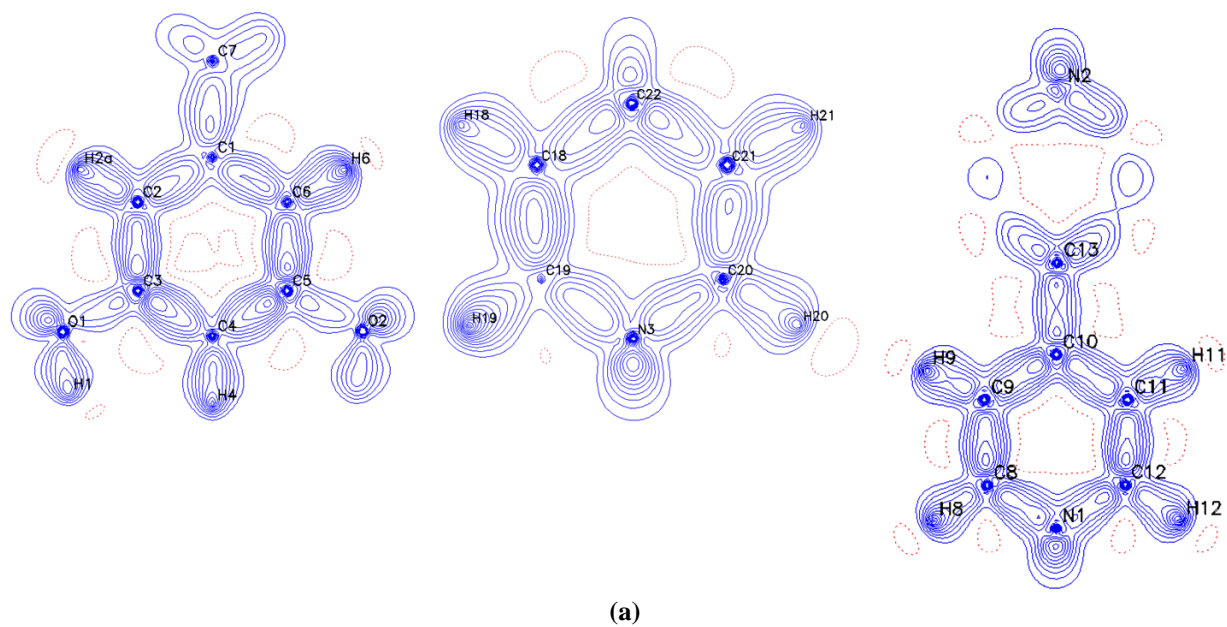

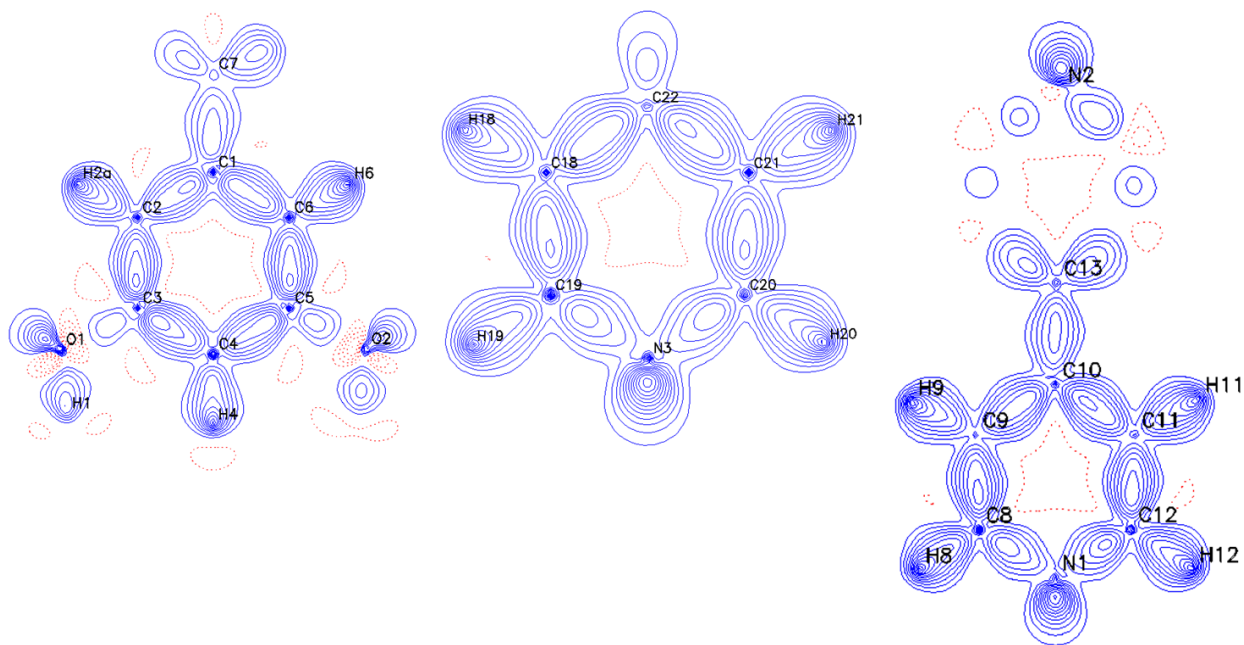

(b)

**Fig. 7a:** Comparison of 2D deformation density maps from (a) SBFA (b) Theory in Form II

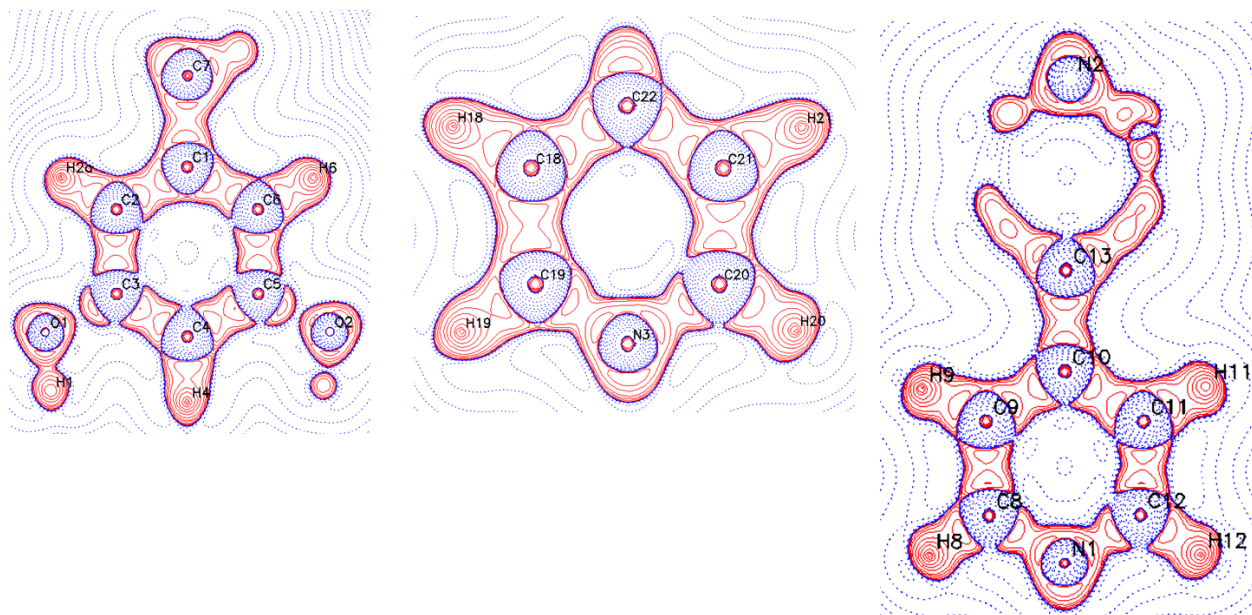

(a)

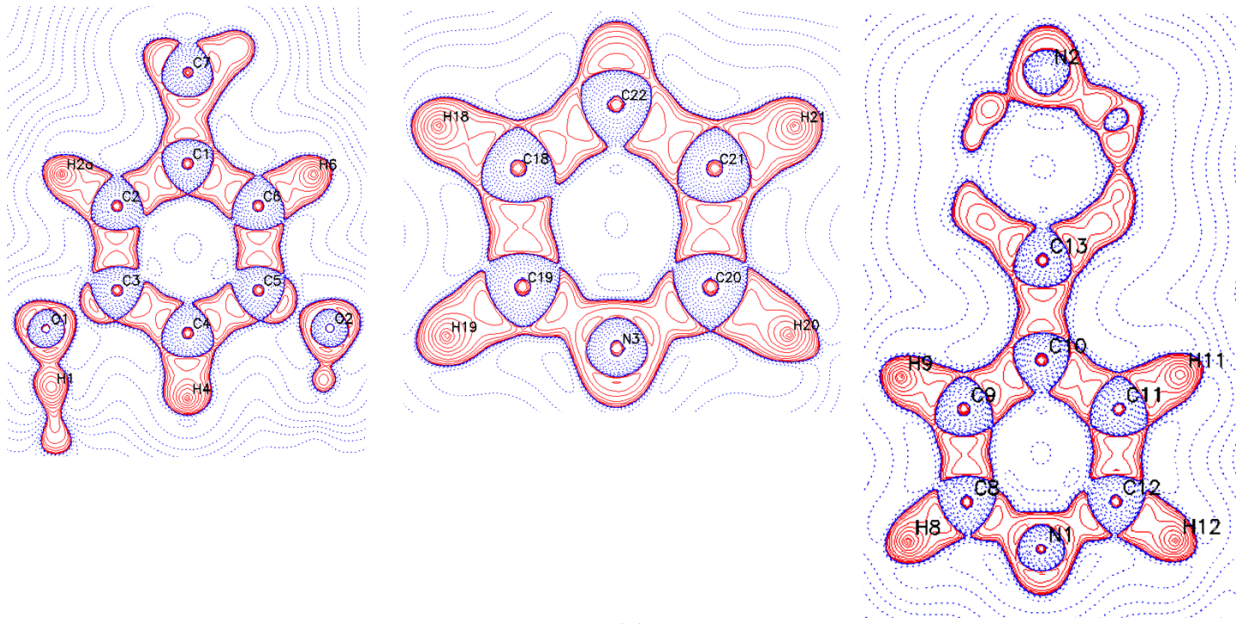

(b)

**Fig. 7b:** Comparison of 2D Laplacian maps from (a) SBFA (b) Theory in Form II

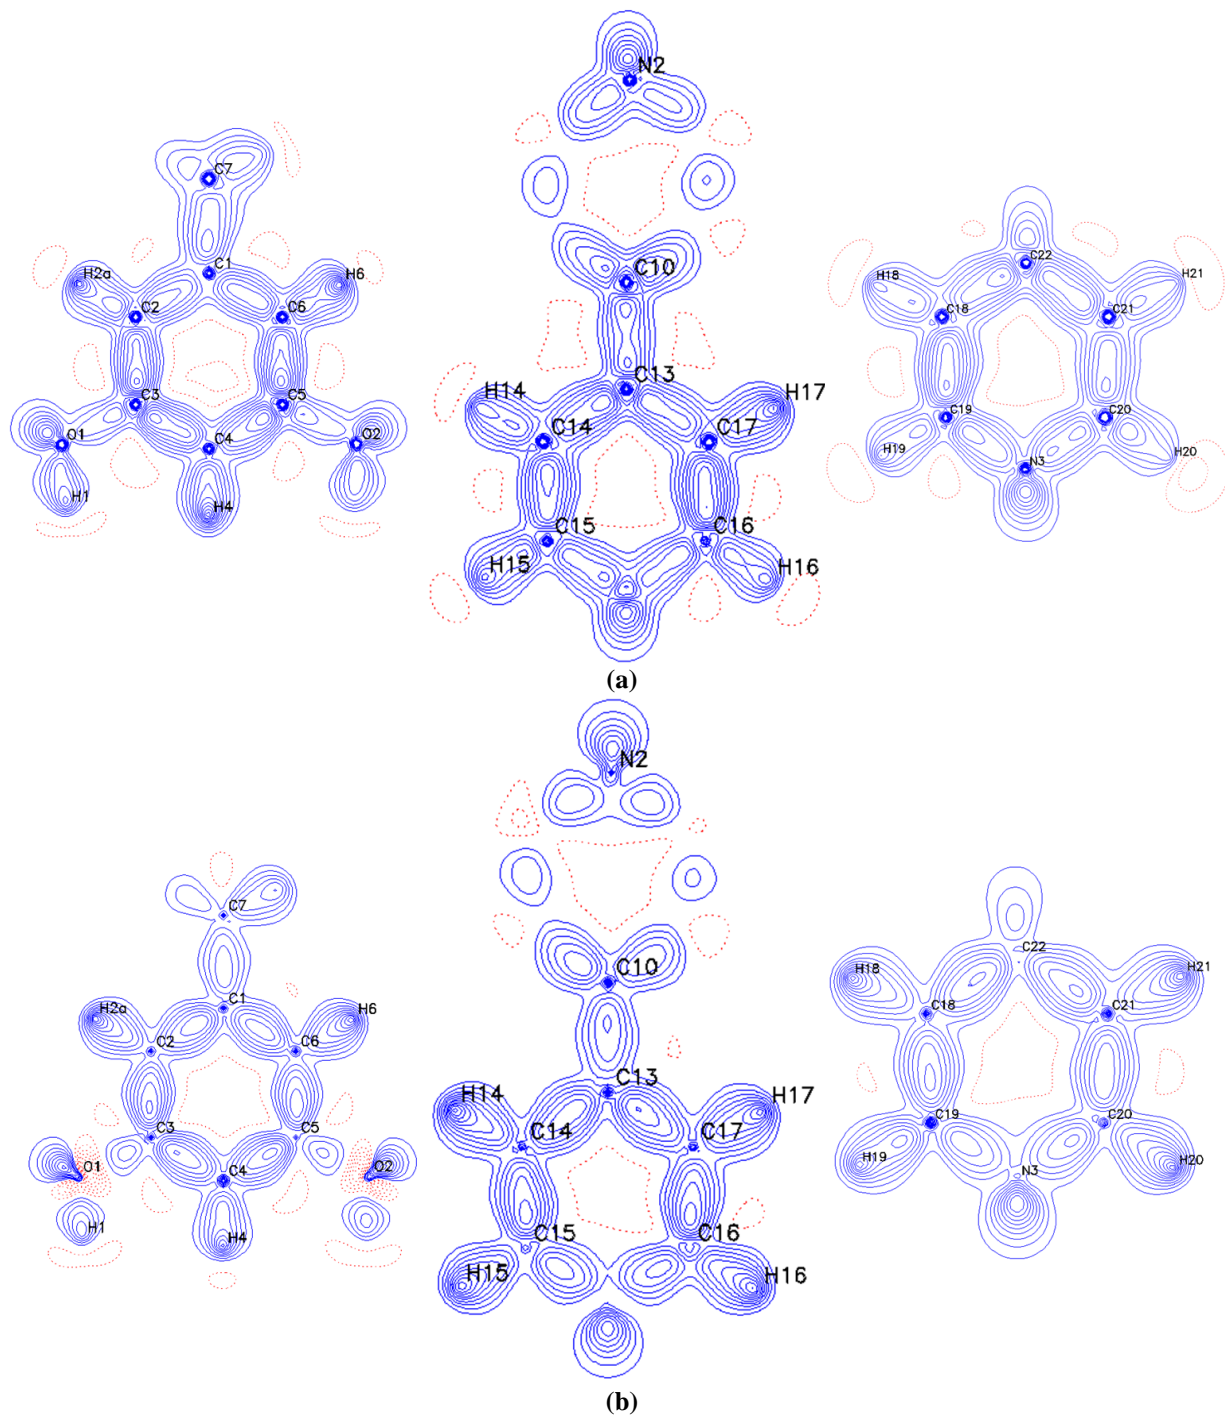

**Fig. 8a:** Comparison of 2D deformation density maps from (a) SBFA (b) Theory in Form III

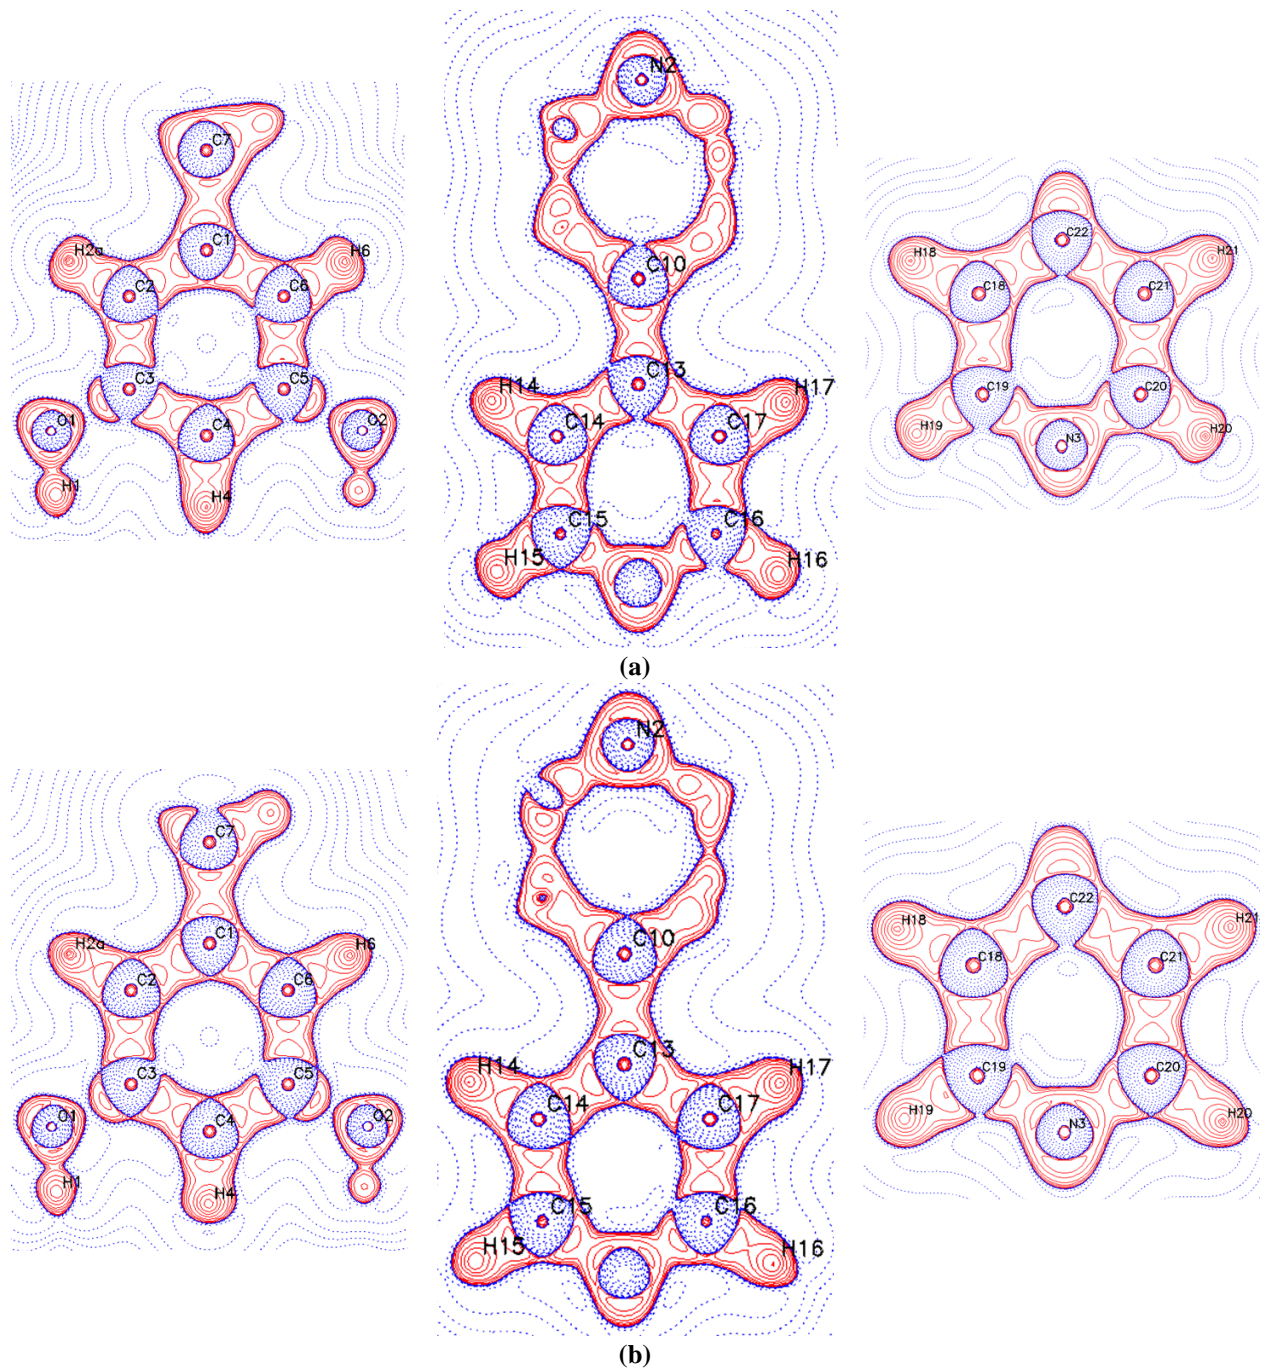

**Fig. 8b:** Comparison of 2D Laplacian maps from (a) SBFA (b) Theory in Form III



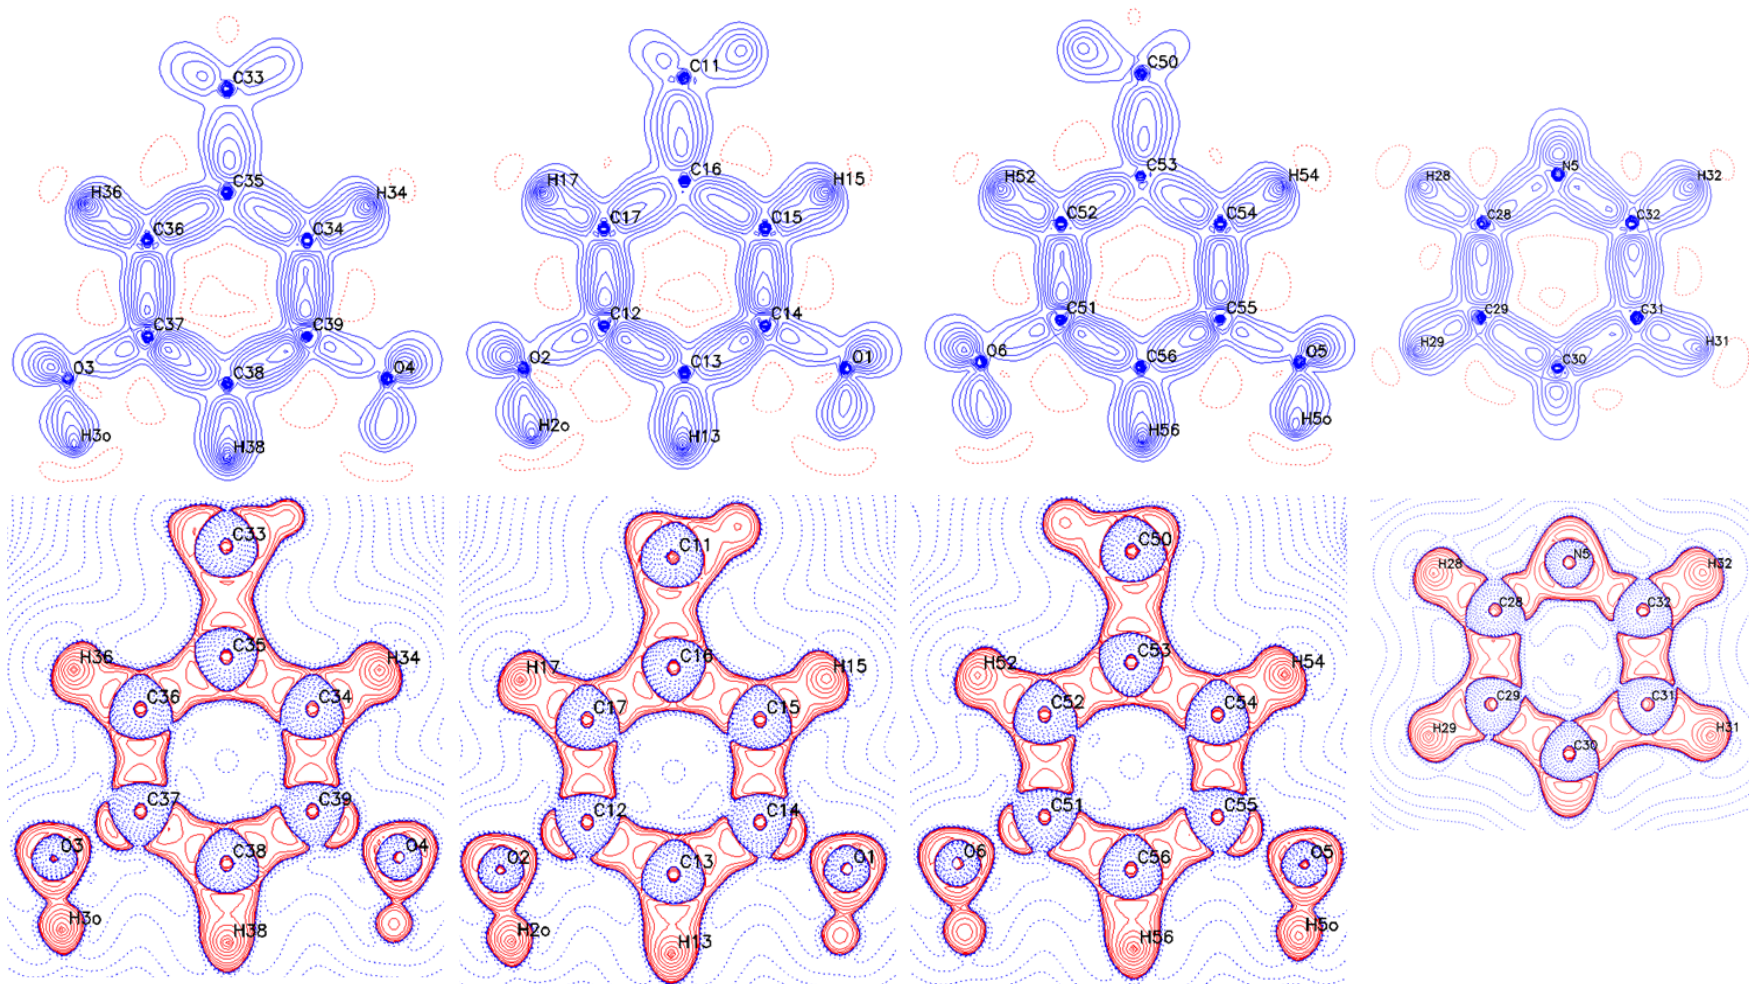

**Fig. 9a:** Deformation density and Laplacian maps of orcinols and half bipyridine in Form IV from SBFA.

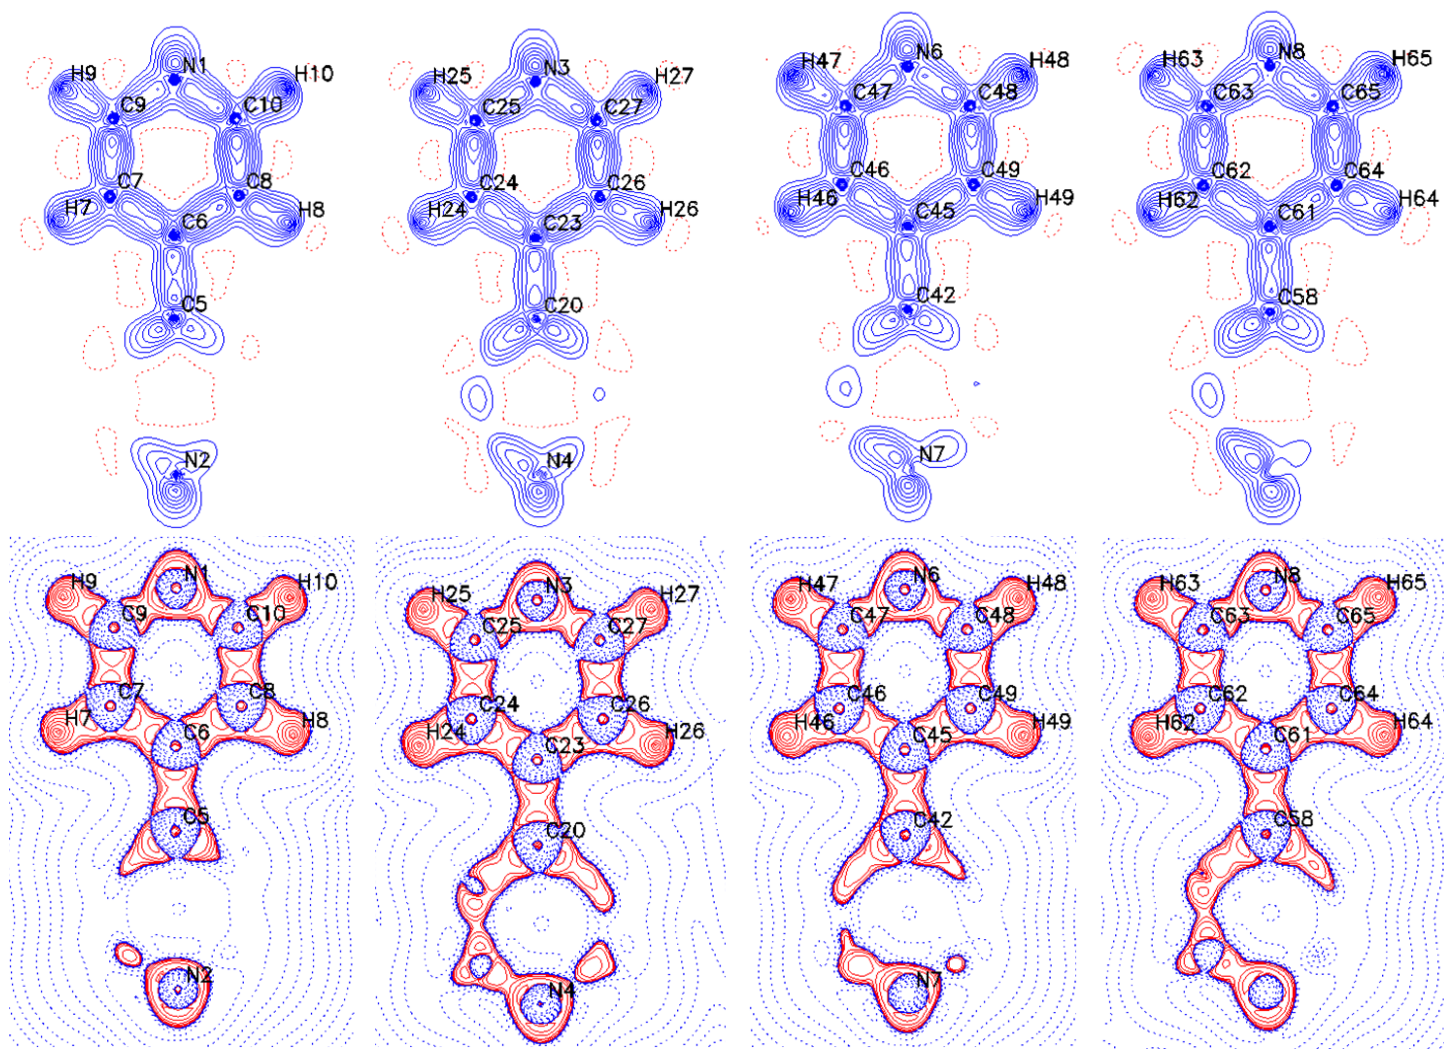

**Fig. 9b:** Deformation density and Laplacian maps of bipyridines in Form IV from SBFA.

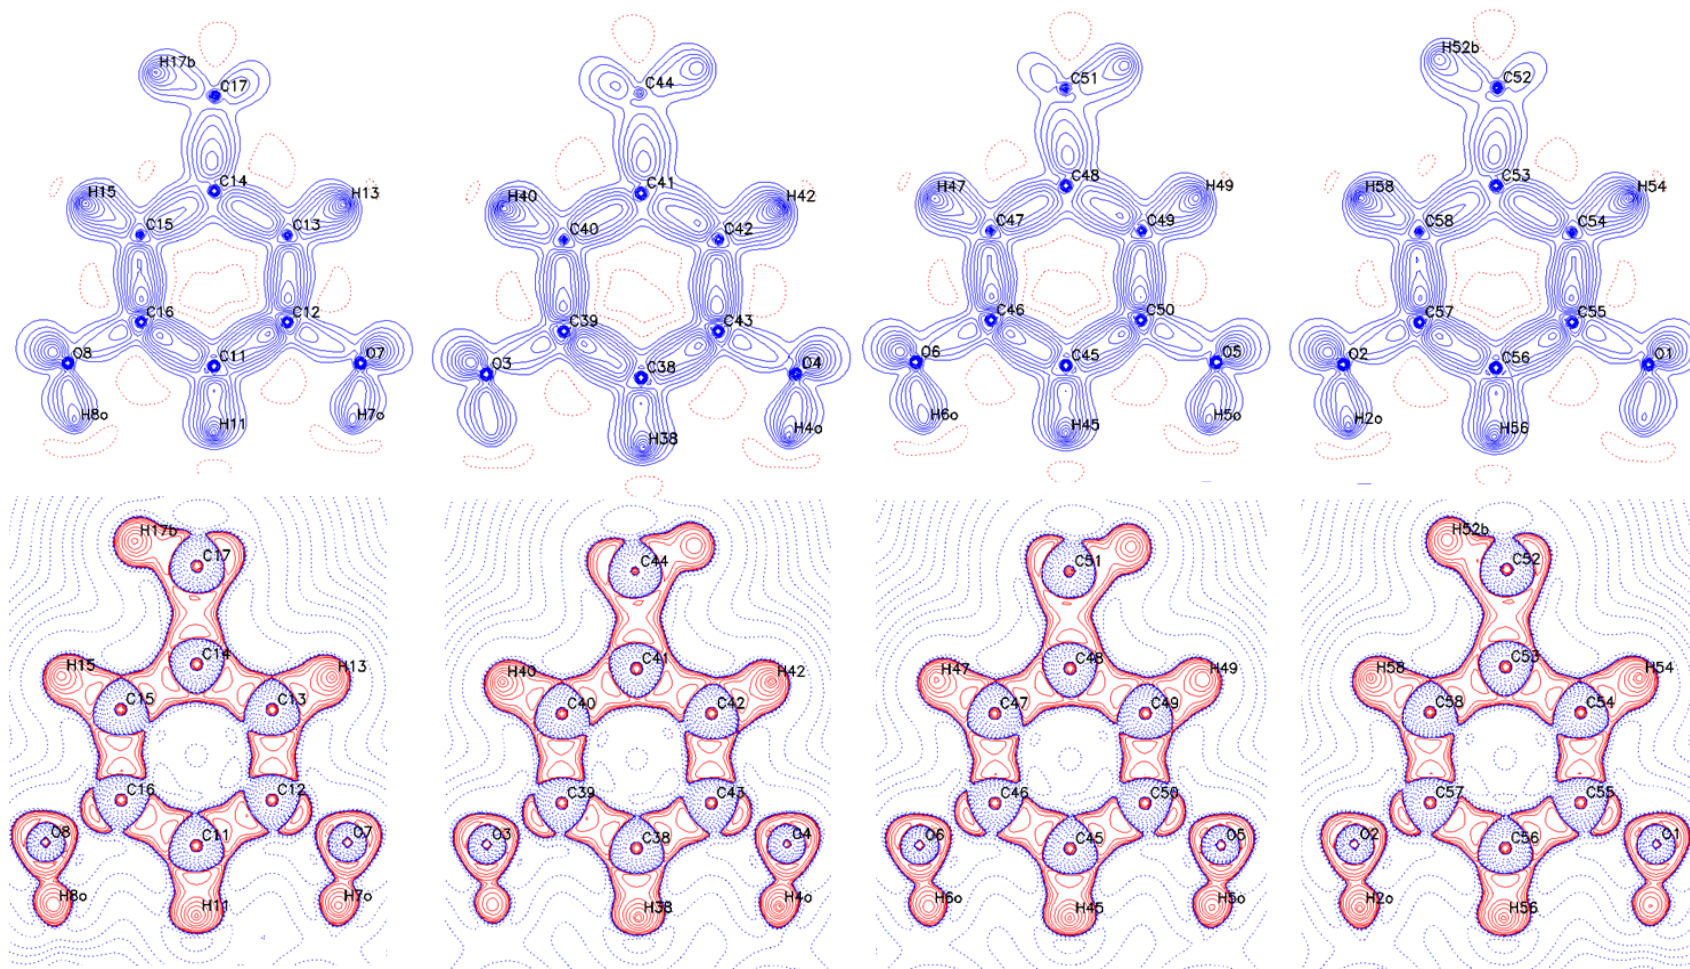

**Fig. 10a:** Deformation density and Laplacian maps of orcinols in Form **V** from SBFA.

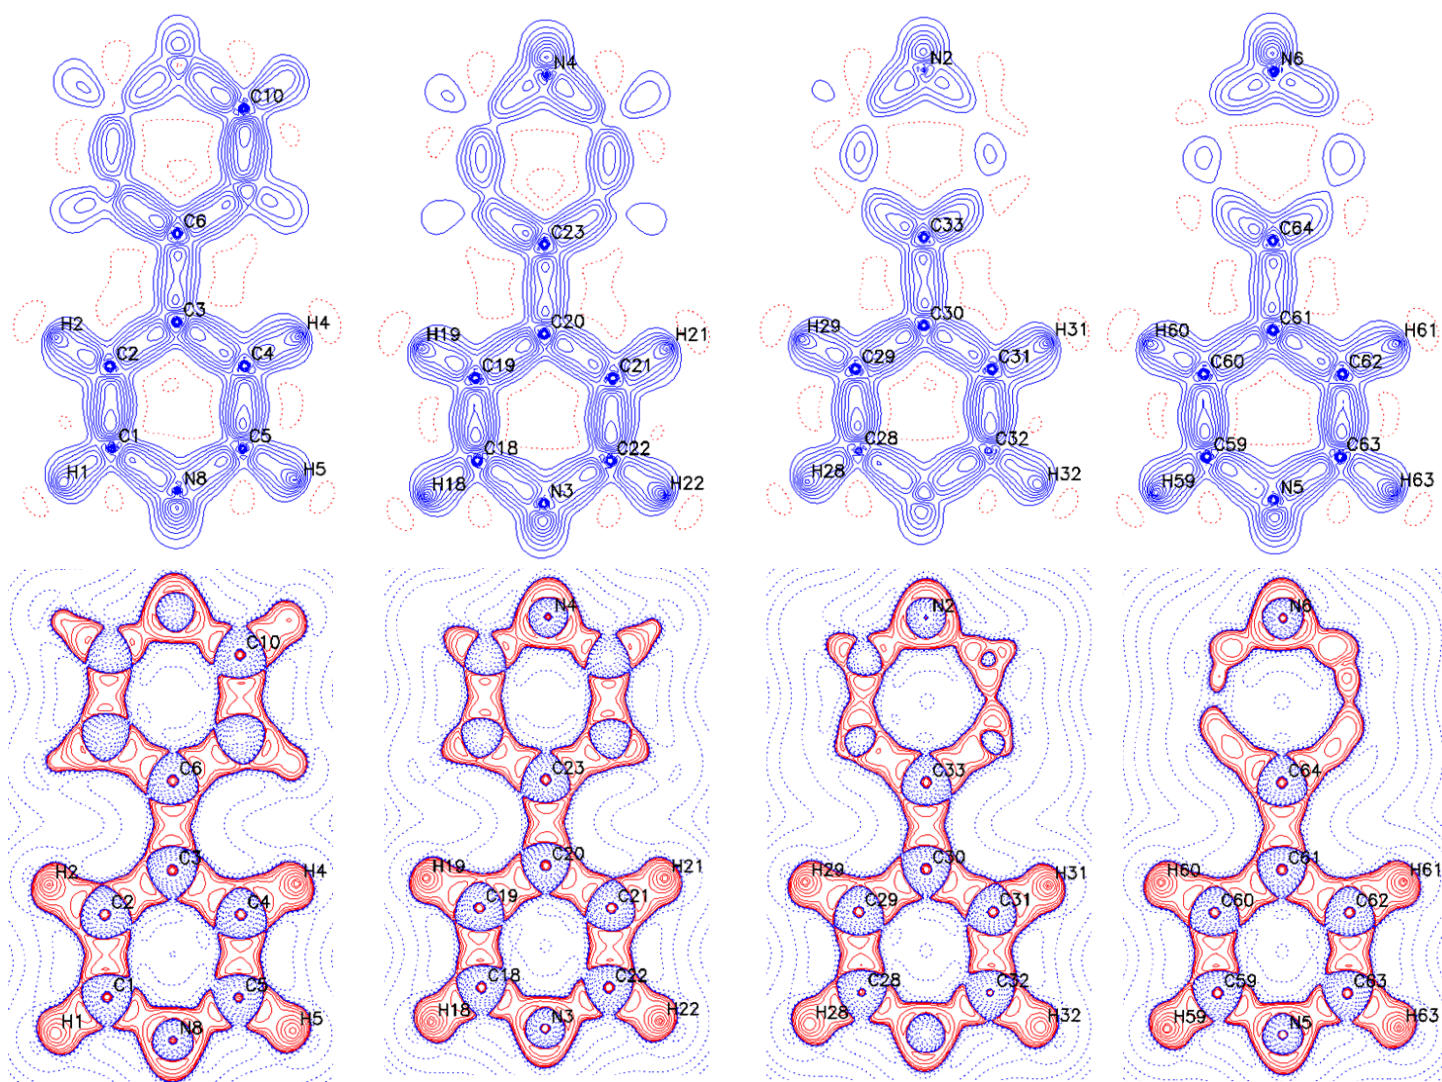

**Fig. 10b:** Deformation density and Laplacian maps of bipyridines in Form V from SBFA.

## References:

- Hathwar, V. R. & Guru Row, T. N. (2010). *J. Phys. Chem. A* **114**, 13434–13441.
- Hathwar, V. R., Pal, R. & Guru Row, T. N. (2010). *Cryst. Growth Des.* **10**, 3306.
- Hathwar, V. R. & Guru Row, T. N. (2011). *Cryst. Growth Des.* **11**, 1338.
- Hathwar, V. R., Thakur, T. S., Guru Row, T. N. & Desiraju, G. R. (2011). *Cryst. Growth Des.* **11**, 616.
- Hathwar, V. R., Thakur, T. S., Dubey, R., Pavan, M. S., Guru Row, T. N. & Desiraju, G. R. (2011). *J. Phys. Chem. A* **115**, 12852–12863.
- Macchi, P. & Coppens, P. (2001). *Acta Crystallogr., Sect. A: Found. Crystallogr.* **57**, 656-662.
- Madsen, A. (2006). *J. Appl. Crystallogr.* **39**, 757–758.
- Munshi, P., Madsen, A. O., Spackman, M. A., Larsen, S. & Destro, R. (2008). *Acta Crystallogr., Sect. A: Found. Crystallogr.* **64**, 465–475.
- Su, Z.; Coppens, P. (1998) *Acta Crystallogr., Sect. A: Found. Crystallogr.*, **54**, 357.
- Volkov, A., Macchi, P., Farrugia, L. J., Gatti, C., Mallinson, P. R., Richter, T. & Koritsanszky, T. S. (2006). *XD2006*. Version 5.34. University at Buffalo, State University of New York, NY, USA, New York.
